# Supplementary material
Source: ML conference proceedings conference paper supplement (https://openreview.net/forum?id=3UE3Aatcjy)
Supplement: supplementary_material [file cmu-mocap-index-spreadsheet.xls]

## Sheet: CMU_mocap
01_01	playground - forward jumps, turn around	Subject #1 (climb, swing, hang on playground equipment)
01_02	playground - climb	Subject #1 (climb, swing, hang on playground equipment)
01_03	playground - climb, hang, swing	Subject #1 (climb, swing, hang on playground equipment)
01_04	playground - climb	Subject #1 (climb, swing, hang on playground equipment)
01_05	playground - climb, go under	Subject #1 (climb, swing, hang on playground equipment)
01_06	playground - climb, sit, dangle legs, descend	Subject #1 (climb, swing, hang on playground equipment)
01_07	playground - climb, sit, dangle legs, jump down	Subject #1 (climb, swing, hang on playground equipment)
01_08	playground - climb, sit, dangle legs, rock back, lower self to ground	Subject #1 (climb, swing, hang on playground equipment)
01_09	playground - climb, hang, hold self up with arms straight, swing, drop, sit, dangle legs, go under	Subject #1 (climb, swing, hang on playground equipment)
01_10	playground - climb, swing, lean back, drop	Subject #1 (climb, swing, hang on playground equipment)
01_11	playground - climb, hang, lean over, jump down	Subject #1 (climb, swing, hang on playground equipment)
01_12	playground - climb, pull up, dangle, sit, lower self to ground	Subject #1 (climb, swing, hang on playground equipment)
01_13	playground - climb, go under, jump down	Subject #1 (climb, swing, hang on playground equipment)
01_14	playground - climb, jump down, dangle, legs push off against	Subject #1 (climb, swing, hang on playground equipment)
02_01	walk	Subject #2 (various expressions and human behaviors)
02_02	walk	Subject #2 (various expressions and human behaviors)
02_03	run/jog	Subject #2 (various expressions and human behaviors)
02_04	jump, balance	Subject #2 (various expressions and human behaviors)
02_05	punch/strike	Subject #2 (various expressions and human behaviors)
02_06	bend over, scoop up, rise, lift arm	Subject #2 (various expressions and human behaviors)
02_07	swordplay	Subject #2 (various expressions and human behaviors)
02_08	swordplay	Subject #2 (various expressions and human behaviors)
02_09	swordplay	Subject #2 (various expressions and human behaviors)
02_10	wash self	Subject #2 (various expressions and human behaviors)
03_01	walk on uneven terrain	Subject #3 (walk on uneven terrain)
03_02	walk on uneven terrain	Subject #3 (walk on uneven terrain)
03_03	walk on uneven terrain	Subject #3 (walk on uneven terrain)
03_04	walk on uneven terrain	Subject #3 (walk on uneven terrain)
05_01	walk	Subject #5 (modern dance)
05_02	dance - expressive arms, pirouette	Subject #5 (modern dance)
05_03	dance - sideways arabesque, turn step, folding arms	Subject #5 (modern dance)
05_04	dance - sideways arabesque, folding arms, bending back	Subject #5 (modern dance)
05_05	dance - quasi-cou-de-pied, raised leg above hip-height, jete en tourant	Subject #5 (modern dance)
05_06	dance - cartwheel-like start, pirouettes, jete	Subject #5 (modern dance)
05_07	dance - small jetes, attitude/arabesque, shifted-axis pirouette, turn	Subject #5 (modern dance)
05_08	dance - rond de jambe in the air, jete, turn	Subject #5 (modern dance)
05_09	dance - glissade devant, glissade derriere, attitude/arabesque	Subject #5 (modern dance)
05_10	dance - glissade devant, glissade derriere, attitude/arabesque	Subject #5 (modern dance)
05_11	dance - sideways steps, pirouette	Subject #5 (modern dance)
05_12	dance - arms held high, pointe tendue a terre, upper body rotation	Subject #5 (modern dance)
05_13	dance - small jetes, pirouette	Subject #5 (modern dance)
05_14	dance - retire derriere, attitude/arabesque	Subject #5 (modern dance)
05_15	dance - retire derriere, attitude/arabesque	Subject #5 (modern dance)
05_16	dance - coupe dessous, jete en tourant	Subject #5 (modern dance)
05_17	dance - coupe dessous, grand jete en tourant	Subject #5 (modern dance)
05_18	dance - attitude/arabesque, jete en tourant, bending back	Subject #5 (modern dance)
05_19	dance - attitude/arabesque, jete en tourant, bending back	Subject #5 (modern dance)
05_20	dance - attitude/arabesque, jete en tourant, bending back	Subject #5 (modern dance)
06_01	walk	Subject #6 (dribble, shoot basketball)
06_02	basketball - forward dribble	Subject #6 (dribble, shoot basketball)
06_03	basketball - forward dribble	Subject #6 (dribble, shoot basketball)
06_04	basketball - forward dribble	Subject #6 (dribble, shoot basketball)
06_05	basketball - forward dribble	Subject #6 (dribble, shoot basketball)
06_06	basketball - backward dribble	Subject #6 (dribble, shoot basketball)
06_07	basketball - backward dribble	Subject #6 (dribble, shoot basketball)
06_08	basketball - sideways dribble	Subject #6 (dribble, shoot basketball)
06_09	basketball - sideways dribble	Subject #6 (dribble, shoot basketball)
06_10	basketball - forward dribble, 90-degree left turns	Subject #6 (dribble, shoot basketball)
06_11	basketball - forward dribble, 90-degree right turns	Subject #6 (dribble, shoot basketball)
06_12	basketball - forward dribble, 90-degree right turns, crossover dribble	Subject #6 (dribble, shoot basketball)
06_13	basketball - low, fast free style dribble, dribble through legs	Subject #6 (dribble, shoot basketball)
06_14	basketball - crossover dribble, shoot	Subject #6 (dribble, shoot basketball)
06_15	basketball - dribble, shoot	Subject #6 (dribble, shoot basketball)
07_01	walk	Subject #7 (walk)
07_02	walk	Subject #7 (walk)
07_03	walk	Subject #7 (walk)
07_04	slow walk	Subject #7 (walk)
07_05	slow walk	Subject #7 (walk)
07_06	walk	Subject #7 (walk)
07_07	walk	Subject #7 (walk)
07_08	walk	Subject #7 (walk)
07_09	walk	Subject #7 (walk)
07_10	walk	Subject #7 (walk)
07_11	walk	Subject #7 (walk)
07_12	brisk walk	Subject #7 (walk)
08_01	walk	Subject #8 (walk)
08_02	walk	Subject #8 (walk)
08_03	walk	Subject #8 (walk)
08_04	slow walk	Subject #8 (walk)
08_05	walk/stride	Subject #8 (walk)
08_06	walk	Subject #8 (walk)
08_07	walk, exaggerated stride	Subject #8 (walk)
08_08	walk	Subject #8 (walk)
08_09	walk	Subject #8 (walk)
08_10	walk	Subject #8 (walk)
08_11	slow walk/stride	Subject #8 (walk)
09_01	run	Subject #9 (run)
09_02	run	Subject #9 (run)
09_03	run	Subject #9 (run)
09_04	run	Subject #9 (run)
09_05	run	Subject #9 (run)
09_06	run	Subject #9 (run)
09_07	run	Subject #9 (run)
09_08	run	Subject #9 (run)
09_09	run	Subject #9 (run)
09_10	run	Subject #9 (run)
09_11	run	Subject #9 (run)
09_12	navigate - walk forward, backward, sideways	Subject #9 (run)
10_01	soccer - kick ball	Subject #10 (kick soccer ball)
10_02	soccer - kick ball	Subject #10 (kick soccer ball)
10_03	soccer - kick ball	Subject #10 (kick soccer ball)
10_04	walk	Subject #10 (kick soccer ball)
10_05	soccer - kick ball	Subject #10 (kick soccer ball)
10_06	soccer - kick ball	Subject #10 (kick soccer ball)
11_01	soccer - kick ball	Subject #11 (kick soccer ball)
12_01	walk	Subject #12 (tai chi, walk)
12_02	walk	Subject #12 (tai chi, walk)
12_03	walk	Subject #12 (tai chi, walk)
12_04	tai chi	Subject #12 (tai chi, walk)
13_01	sit on high stool, stand up	Subject #13 (various everyday behaviors)
13_02	sit on high stool, stand up	Subject #13 (various everyday behaviors)
13_03	sit on high stool, stand up	Subject #13 (various everyday behaviors)
13_04	sit on stepstool, chin in hand	Subject #13 (various everyday behaviors)
13_05	sit on stepstool, hands against chin, fidget, stand up	Subject #13 (various everyday behaviors)
13_06	sit on stepstool, hands against chin, elbow out, stand up	Subject #13 (various everyday behaviors)
13_07	unscrew bottlecap, drink soda	Subject #13 (various everyday behaviors)
13_08	unscrew bottlecap, drink soda, screw on bottlecap	Subject #13 (various everyday behaviors)
13_09	drink soda	Subject #13 (various everyday behaviors)
13_10	jump up to grab, reach for, tiptoe	Subject #13 (various everyday behaviors)
13_11	forward jump	Subject #13 (various everyday behaviors)
13_12	jump up to grab, reach for, tiptoe	Subject #13 (various everyday behaviors)
13_13	forward jump	Subject #13 (various everyday behaviors)
13_14	laugh	Subject #13 (various everyday behaviors)
13_15	laugh	Subject #13 (various everyday behaviors)
13_16	laugh	Subject #13 (various everyday behaviors)
13_17	boxing	Subject #13 (various everyday behaviors)
13_18	boxing	Subject #13 (various everyday behaviors)
13_19	forward jump	Subject #13 (various everyday behaviors)
13_20	wash windows	Subject #13 (various everyday behaviors)
13_21	wash windows	Subject #13 (various everyday behaviors)
13_22	wash windows	Subject #13 (various everyday behaviors)
13_23	sweep floor	Subject #13 (various everyday behaviors)
13_24	sweep floor	Subject #13 (various everyday behaviors)
13_25	sweep floor	Subject #13 (various everyday behaviors)
13_26	direct traffic, wave	Subject #13 (various everyday behaviors)
13_27	direct traffic, wave, point	Subject #13 (various everyday behaviors)
13_28	direct traffic, wave, point	Subject #13 (various everyday behaviors)
13_29	jumping jacks, side twists, bend over, squats	Subject #13 (various everyday behaviors)
13_30	jumping jacks, side twists, squats, jog	Subject #13 (various everyday behaviors)
13_31	jumping jacks, side twists, bend over, jog	Subject #13 (various everyday behaviors)
13_32	forward jump	Subject #13 (various everyday behaviors)
13_33	climb ladder	Subject #13 (various everyday behaviors)
13_34	climb ladder	Subject #13 (various everyday behaviors)
13_35	climb 3 steps	Subject #13 (various everyday behaviors)
13_36	climb 3 steps	Subject #13 (various everyday behaviors)
13_37	climb 3 steps	Subject #13 (various everyday behaviors)
13_38	climb 3 steps	Subject #13 (various everyday behaviors)
13_39	jump	Subject #13 (various everyday behaviors)
13_40	jump	Subject #13 (various everyday behaviors)
13_41	jump	Subject #13 (various everyday behaviors)
13_42	jump	Subject #13 (various everyday behaviors)
14_01	boxing	Subject #14 (various everyday behaviors)
14_02	boxing	Subject #14 (various everyday behaviors)
14_03	boxing	Subject #14 (various everyday behaviors)
14_04	drink soda, screw on bottlecap	Subject #14 (various everyday behaviors)
14_05	unscrew bottlecap, drink soda	Subject #14 (various everyday behaviors)
14_06	jumping jacks, jog, squats, side twists, stretches	Subject #14 (various everyday behaviors)
14_07	jump up to grab, reach for, tiptoe	Subject #14 (various everyday behaviors)
14_08	jump up to grab, reach for, tiptoe	Subject #14 (various everyday behaviors)
14_09	jump up to grab, reach for, tiptoe	Subject #14 (various everyday behaviors)
14_10	wash windows	Subject #14 (various everyday behaviors)
14_11	wash windows	Subject #14 (various everyday behaviors)
14_12	wash windows	Subject #14 (various everyday behaviors)
14_13	mop floor	Subject #14 (various everyday behaviors)
14_14	jumping jacks, jog, squats, side twists, stretches	Subject #14 (various everyday behaviors)
14_15	mop floor	Subject #14 (various everyday behaviors)
14_16	sweep floor	Subject #14 (various everyday behaviors)
14_17	laugh	Subject #14 (various everyday behaviors)
14_18	laugh	Subject #14 (various everyday behaviors)
14_19	laugh	Subject #14 (various everyday behaviors)
14_20	jumping jacks, side twists, reach up, bend over	Subject #14 (various everyday behaviors)
14_21	climb 3 steps	Subject #14 (various everyday behaviors)
14_22	climb 3 steps	Subject #14 (various everyday behaviors)
14_23	climb 3 steps	Subject #14 (various everyday behaviors)
14_24	direct traffic, wave, point	Subject #14 (various everyday behaviors)
14_25	direct traffic, wave, point	Subject #14 (various everyday behaviors)
14_26	direct traffic, wave, point	Subject #14 (various everyday behaviors)
14_27	sit on high stool, stand up	Subject #14 (various everyday behaviors)
14_28	sit on high stool, stand up	Subject #14 (various everyday behaviors)
14_29	sit on stepstool, stand up, swing legs	Subject #14 (various everyday behaviors)
14_30	sit on stepstool, ankle on other knee, hand on chin	Subject #14 (various everyday behaviors)
14_31	sit on stepstool, stand up	Subject #14 (various everyday behaviors)
14_32	sit on stepstool, stand up	Subject #14 (various everyday behaviors)
14_33	climb ladder	Subject #14 (various everyday behaviors)
14_34	climb ladder	Subject #14 (various everyday behaviors)
14_35	climb ladder	Subject #14 (various everyday behaviors)
14_36	sit on stepstool, stand up	Subject #14 (various everyday behaviors)
14_37	drink soda	Subject #14 (various everyday behaviors)
15_01	walk/wander	Subject #15 (various everyday behaviors, dance moves)
15_02	climb, step over, sit on, stand on stepstool	Subject #15 (various everyday behaviors, dance moves)
15_03	walk/wander	Subject #15 (various everyday behaviors, dance moves)
15_04	wash windows, paint; hand signals; dance - Egyptian walk, the Dive, the Twist, the Cabbage Patch; boxing	Subject #15 (various everyday behaviors, dance moves)
15_05	wash windows, paint; hand signals; dance - Egyptian walk, the Dive, the Twist, the Cabbage Patch; boxing	Subject #15 (various everyday behaviors, dance moves)
15_06	lean forward, reach for	Subject #15 (various everyday behaviors, dance moves)
15_07	lean forward, tiptoe, reach for	Subject #15 (various everyday behaviors, dance moves)
15_08	hand signals - horizontally revolve forearms	Subject #15 (various everyday behaviors, dance moves)
15_09	walk/wander	Subject #15 (various everyday behaviors, dance moves)
15_10	sit on high stool, stand up	Subject #15 (various everyday behaviors, dance moves)
15_11	wash windows, paint figure eights; hand signals	Subject #15 (various everyday behaviors, dance moves)
15_12	wash windows; basketball - dribble, lay-up shot, pass; throw ball; dance - Egyptian walk, the Dive, the Twist; strew	Subject #15 (various everyday behaviors, dance moves)
15_13	boxing	Subject #15 (various everyday behaviors, dance moves)
15_14	walk/wander	Subject #15 (various everyday behaviors, dance moves)
16_01	jump	Subject #16 (run, jump, walk)
16_02	jump	Subject #16 (run, jump, walk)
16_03	high jump	Subject #16 (run, jump, walk)
16_04	high jump	Subject #16 (run, jump, walk)
16_05	forward jump	Subject #16 (run, jump, walk)
16_06	forward jump	Subject #16 (run, jump, walk)
16_07	forward jump	Subject #16 (run, jump, walk)
16_08	run/jog, sudden stop	Subject #16 (run, jump, walk)
16_09	forward jump	Subject #16 (run, jump, walk)
16_10	forward jump	Subject #16 (run, jump, walk)
16_11	walk, veer left	Subject #16 (run, jump, walk)
16_12	walk, veer left	Subject #16 (run, jump, walk)
16_13	walk, veer right	Subject #16 (run, jump, walk)
16_14	walk, veer right	Subject #16 (run, jump, walk)
16_15	walk	Subject #16 (run, jump, walk)
16_16	walk	Subject #16 (run, jump, walk)
16_17	walk, 90-degree left turn	Subject #16 (run, jump, walk)
16_18	walk, 90-degree left turn	Subject #16 (run, jump, walk)
16_19	walk, 90-degree right turn	Subject #16 (run, jump, walk)
16_20	walk, 90-degree right turn	Subject #16 (run, jump, walk)
16_21	walk	Subject #16 (run, jump, walk)
16_22	walk	Subject #16 (run, jump, walk)
16_23	walk, veer left	Subject #16 (run, jump, walk)
16_24	walk, veer left	Subject #16 (run, jump, walk)
16_25	walk, veer right	Subject #16 (run, jump, walk)
16_26	walk, veer right	Subject #16 (run, jump, walk)
16_27	walk, 90-degree left turn	Subject #16 (run, jump, walk)
16_28	walk, 90-degree left turn	Subject #16 (run, jump, walk)
16_29	walk, 90-degree right turn	Subject #16 (run, jump, walk)
16_30	walk, 90-degree right turn	Subject #16 (run, jump, walk)
16_31	walk	Subject #16 (run, jump, walk)
16_32	walk	Subject #16 (run, jump, walk)
16_33	slow walk, stop	Subject #16 (run, jump, walk)
16_34	slow walk, stop	Subject #16 (run, jump, walk)
16_35	run/jog	Subject #16 (run, jump, walk)
16_36	run/jog	Subject #16 (run, jump, walk)
16_37	run/jog, veer left	Subject #16 (run, jump, walk)
16_38	run/jog, veer left	Subject #16 (run, jump, walk)
16_39	run/jog, veer right	Subject #16 (run, jump, walk)
16_40	run/jog, veer right	Subject #16 (run, jump, walk)
16_41	run/jog, 90-degree left turn	Subject #16 (run, jump, walk)
16_42	run/jog, 90-degree left turn	Subject #16 (run, jump, walk)
16_43	run/jog, 90-degree right turn	Subject #16 (run, jump, walk)
16_44	run/jog, 90-degree right turn	Subject #16 (run, jump, walk)
16_45	run/jog	Subject #16 (run, jump, walk)
16_46	run/jog	Subject #16 (run, jump, walk)
16_47	walk	Subject #16 (run, jump, walk)
16_48	run, veer left	Subject #16 (run, jump, walk)
16_49	run, veer right	Subject #16 (run, jump, walk)
16_50	run, veer right	Subject #16 (run, jump, walk)
16_51	run, 90-degree left turn	Subject #16 (run, jump, walk)
16_52	run, 90-degree left turn	Subject #16 (run, jump, walk)
16_53	run, 90-degree right turn	Subject #16 (run, jump, walk)
16_54	run, 90-degree right turn	Subject #16 (run, jump, walk)
16_55	run	Subject #16 (run, jump, walk)
16_56	run/jog	Subject #16 (run, jump, walk)
16_57	run/jog, sudden stop	Subject #16 (run, jump, walk)
16_58	walk	Subject #16 (run, jump, walk)
17_01	walk with anger, frustration	Subject #17 (different walking styles)
17_02	walk with anger, frustration	Subject #17 (different walking styles)
17_03	walk stealthily	Subject #17 (different walking styles)
17_04	walk stealthily	Subject #17 (different walking styles)
17_05	walk/hobble	Subject #17 (different walking styles)
17_06	whistle, walk jauntily	Subject #17 (different walking styles)
17_07	whistle, walk jauntily	Subject #17 (different walking styles)
17_08	muscular, heavyset person's walk	Subject #17 (different walking styles)
17_09	muscular, heavyset person's walk	Subject #17 (different walking styles)
17_10	boxing	Subject #17 (different walking styles)
18_01	walk, shake hands (2 subjects - subject A)	Subject #18 (human interaction and communication (2 subjects - subject A))
18_02	walk, shake hands (2 subjects - subject A)	Subject #18 (human interaction and communication (2 subjects - subject A))
18_03	A pulls B; B resists (2 subjects - subject A)	Subject #18 (human interaction and communication (2 subjects - subject A))
18_04	A pulls B; B resists (2 subjects - subject A)	Subject #18 (human interaction and communication (2 subjects - subject A))
18_05	A pulls B by the elbow; B resists (2 subjects - subject A)	Subject #18 (human interaction and communication (2 subjects - subject A))
18_06	A pulls B by the elbow; B resists (2 subjects - subject A)	Subject #18 (human interaction and communication (2 subjects - subject A))
18_07	navigate busy sidewalk; A leads the way, takes B by the arm (2 subjects - subject A)	Subject #18 (human interaction and communication (2 subjects - subject A))
18_08	conversation - explain with hand gestures (2 subjects - subject A)	Subject #18 (human interaction and communication (2 subjects - subject A))
18_09	conversation - explain with hand gestures, walk (2 subjects - subject A)	Subject #18 (human interaction and communication (2 subjects - subject A))
18_10	quarrel - angry hand gestures (2 subjects - subject A)	Subject #18 (human interaction and communication (2 subjects - subject A))
18_11	quarrel - angry hand gestures (2 subjects - subject A)	Subject #18 (human interaction and communication (2 subjects - subject A))
18_12	friends meet, hang out; A sits, B joins A (2 subjects - subject A)	Subject #18 (human interaction and communication (2 subjects - subject A))
18_13	run, scramble for last seat (2 subjects - subject A)	Subject #18 (human interaction and communication (2 subjects - subject A))
18_14	run, scramble for last seat (2 subjects - subject A)	Subject #18 (human interaction and communication (2 subjects - subject A))
18_15	chicken dance (2 subjects - subject A)	Subject #18 (human interaction and communication (2 subjects - subject A))
19_01	walk, shake hands (2 subjects - subject B)	Subject #19 (human interaction and communication (2 subjects - subject B))
19_02	walk, shake hands (2 subjects - subject B)	Subject #19 (human interaction and communication (2 subjects - subject B))
19_03	A pulls B; B resists (2 subjects - subject B)	Subject #19 (human interaction and communication (2 subjects - subject B))
19_04	A pulls B; B resists (2 subjects - subject B)	Subject #19 (human interaction and communication (2 subjects - subject B))
19_05	A pulls B by the elbow; B resists (2 subjects - subject B)	Subject #19 (human interaction and communication (2 subjects - subject B))
19_06	A pulls B by the elbow; B resists (2 subjects - subject B)	Subject #19 (human interaction and communication (2 subjects - subject B))
19_07	navigate busy sidewalk; A leads the way, takes B by the arm (2 subjects - subject B)	Subject #19 (human interaction and communication (2 subjects - subject B))
19_08	conversation - explain with hand gestures (2 subjects - subject B)	Subject #19 (human interaction and communication (2 subjects - subject B))
19_09	conversation - explain with hand gestures, walk (2 subjects - subject B)	Subject #19 (human interaction and communication (2 subjects - subject B))
19_10	quarrel - angry hand gestures (2 subjects - subject B)	Subject #19 (human interaction and communication (2 subjects - subject B))
19_11	quarrel - angry hand gestures (2 subjects - subject B)	Subject #19 (human interaction and communication (2 subjects - subject B))
19_12	friends meet, hang out; A sits, B joins A (2 subjects - subject B)	Subject #19 (human interaction and communication (2 subjects - subject B))
19_13	run, scramble for last seat (2 subjects - subject B)	Subject #19 (human interaction and communication (2 subjects - subject B))
19_14	run, scramble for last seat (2 subjects - subject B)	Subject #19 (human interaction and communication (2 subjects - subject B))
19_15	chicken dance (2 subjects - subject B)	Subject #19 (human interaction and communication (2 subjects - subject B))
20_01	chicken dance (2 subjects - subject A)	Subject #20 (human interaction - at play, formations (2 subjects - subject A))
20_02	link arms, walk (2 subjects - subject A)	Subject #20 (human interaction - at play, formations (2 subjects - subject A))
20_03	link arms, walk (2 subjects - subject A)	Subject #20 (human interaction - at play, formations (2 subjects - subject A))
20_04	synchronized walk (2 subjects - subject A)	Subject #20 (human interaction - at play, formations (2 subjects - subject A))
20_05	synchronized walk (2 subjects - subject A)	Subject #20 (human interaction - at play, formations (2 subjects - subject A))
20_06	soldiers march (2 subjects - subject A)	Subject #20 (human interaction - at play, formations (2 subjects - subject A))
20_07	soldiers march (2 subjects - subject A)	Subject #20 (human interaction - at play, formations (2 subjects - subject A))
20_08	zombie march (2 subjects - subject A)	Subject #20 (human interaction - at play, formations (2 subjects - subject A))
20_09	nursery rhyme - ring around the rosey (2 subjects - subject A)	Subject #20 (human interaction - at play, formations (2 subjects - subject A))
20_10	360-degree two-person whip (2 subjects - subject A)	Subject #20 (human interaction - at play, formations (2 subjects - subject A))
20_11	high-five, walk (2 subjects - subject A)	Subject #20 (human interaction - at play, formations (2 subjects - subject A))
20_12	low-five, walk (2 subjects - subject A)	Subject #20 (human interaction - at play, formations (2 subjects - subject A))
20_13	blind man's bluff (blindfold tag) (2 subjects - subject A)	Subject #20 (human interaction - at play, formations (2 subjects - subject A))
21_01	chicken dance (2 subjects - subject B)	Subject #21 (human interaction - at play, formations (2 subjects - subject B))
21_02	link arms, walk (2 subjects - subject B)	Subject #21 (human interaction - at play, formations (2 subjects - subject B))
21_03	link arms, walk (2 subjects - subject B)	Subject #21 (human interaction - at play, formations (2 subjects - subject B))
21_04	synchronized walk (2 subjects - subject B)	Subject #21 (human interaction - at play, formations (2 subjects - subject B))
21_05	synchronized walk (2 subjects - subject B)	Subject #21 (human interaction - at play, formations (2 subjects - subject B))
21_06	soldiers march (2 subjects - subject B)	Subject #21 (human interaction - at play, formations (2 subjects - subject B))
21_07	soldiers march (2 subjects - subject B)	Subject #21 (human interaction - at play, formations (2 subjects - subject B))
21_08	zombie march (2 subjects - subject B)	Subject #21 (human interaction - at play, formations (2 subjects - subject B))
21_09	nursery rhyme - ring around the rosey (2 subjects - subject B)	Subject #21 (human interaction - at play, formations (2 subjects - subject B))
21_10	360-degree two-person whip (2 subjects - subject B)	Subject #21 (human interaction - at play, formations (2 subjects - subject B))
21_11	high-five, walk (2 subjects - subject B)	Subject #21 (human interaction - at play, formations (2 subjects - subject B))
21_12	low-five, walk (2 subjects - subject B)	Subject #21 (human interaction - at play, formations (2 subjects - subject B))
21_13	blind man's bluff (blindfold tag) (2 subjects - subject B)	Subject #21 (human interaction - at play, formations (2 subjects - subject B))
22_01	B sits; A pulls up B (2 subjects - subject A)	Subject #22 (human interaction (2 subjects - subject A))
22_02	A sits; B pulls up A (2 subjects - subject A)	Subject #22 (human interaction (2 subjects - subject A))
22_03	A sits, holds face in hands; B kneels, comforts A (2 subjects - subject A)	Subject #22 (human interaction (2 subjects - subject A))
22_04	B comforts A, puts one hand on A's shoulder (2 subjects - subject A)	Subject #22 (human interaction (2 subjects - subject A))
22_05	A comforts B, puts both hands on B's shoulders (2 subjects - subject A)	Subject #22 (human interaction (2 subjects - subject A))
22_06	B comforts A, puts both hands on A's shoulders (2 subjects - subject A)	Subject #22 (human interaction (2 subjects - subject A))
22_07	A comforts B, puts one hand on B's shoulder (2 subjects - subject A)	Subject #22 (human interaction (2 subjects - subject A))
22_08	hold hands, swing arms, walk (2 subjects - subject A)	Subject #22 (human interaction (2 subjects - subject A))
22_09	A gives B a shoulder rub; B sits, A stands (2 subjects - subject A)	Subject #22 (human interaction (2 subjects - subject A))
22_10	A shelters B, a younger child, from harm (2 subjects - subject A)	Subject #22 (human interaction (2 subjects - subject A))
22_11	B shelters A, a younger child, from harm (2 subjects - subject A)	Subject #22 (human interaction (2 subjects - subject A))
22_12	A stumbles into B (2 subjects - subject A)	Subject #22 (human interaction (2 subjects - subject A))
22_13	A passes soda to B; both drink (2 subjects - subject A)	Subject #22 (human interaction (2 subjects - subject A))
22_14	alternating squats (2 subjects - subject A)	Subject #22 (human interaction (2 subjects - subject A))
22_15	alternating jumping jacks (2 subjects - subject A)	Subject #22 (human interaction (2 subjects - subject A))
22_16	synchronized jumping jacks (2 subjects - subject A)	Subject #22 (human interaction (2 subjects - subject A))
22_17	rush up, arm wrestle (2 subjects - subject A)	Subject #22 (human interaction (2 subjects - subject A))
22_18	A stares down B, leans with hands on high stool (2 subjects - subject A)	Subject #22 (human interaction (2 subjects - subject A))
22_19	B stares down A, leans with hands on high stool (2 subjects - subject A)	Subject #22 (human interaction (2 subjects - subject A))
22_20	violence - A picks up high stool, threatens to strike B (2 subjects - subject A)	Subject #22 (human interaction (2 subjects - subject A))
22_21	conversation - B pounds high stool, points at A (2 subjects - subject A)	Subject #22 (human interaction (2 subjects - subject A))
22_22	walk; B catches keys thrown by A (2 subjects - subject A)	Subject #22 (human interaction (2 subjects - subject A))
22_23	walk; A catches keys thrown by B (2 subjects - subject A)	Subject #22 (human interaction (2 subjects - subject A))
22_24	walk; B catches wallet thrown by A (2 subjects - subject A)	Subject #22 (human interaction (2 subjects - subject A))
22_25	walk; A catches wallet thrown by B (2 subjects - subject A)	Subject #22 (human interaction (2 subjects - subject A))
23_01	B sits; A pulls up B (subjects - subject B)	Subject #23 (human interaction (2 subjects - subject B))
23_02	A sits; B pulls up A (subjects - subject B)	Subject #23 (human interaction (2 subjects - subject B))
23_03	A sits, holds face in hands; B kneels, comforts A (2 subjects - subject B)	Subject #23 (human interaction (2 subjects - subject B))
23_04	B comforts A, puts one hand on A's shoulder (2 subjects - subject B)	Subject #23 (human interaction (2 subjects - subject B))
23_05	A comforts B, puts both hands on B's shoulders (2 subjects - subject B)	Subject #23 (human interaction (2 subjects - subject B))
23_06	B comforts A, puts both hands on A's shoulders (2 subjects - subject B)	Subject #23 (human interaction (2 subjects - subject B))
23_07	A comforts B, puts one hand on B's shoulder (2 subjects - subject B)	Subject #23 (human interaction (2 subjects - subject B))
23_08	hold hands, swing arms, walk (2 subjects - subject B)	Subject #23 (human interaction (2 subjects - subject B))
23_09	A gives B a shoulder rub; B sits, A stands (subjects - subject B)	Subject #23 (human interaction (2 subjects - subject B))
23_10	A shelters B, a younger child, from harm (2 subjects - subject B)	Subject #23 (human interaction (2 subjects - subject B))
23_11	B shelters A, a younger child, from harm (2 subjects - subject B)	Subject #23 (human interaction (2 subjects - subject B))
23_12	A stumbles into B (2 subjects - subject B)	Subject #23 (human interaction (2 subjects - subject B))
23_13	A passes soda to B; both drink (2 subjects - subject B)	Subject #23 (human interaction (2 subjects - subject B))
23_14	alternating squats (2 subjects - subject B)	Subject #23 (human interaction (2 subjects - subject B))
23_15	alternating jumping jacks (2 subjects - subject B)	Subject #23 (human interaction (2 subjects - subject B))
23_16	synchronized jumping jacks (2 subjects - subject B)	Subject #23 (human interaction (2 subjects - subject B))
23_17	rush up, arm wrestle (2 subjects - subject B)	Subject #23 (human interaction (2 subjects - subject B))
23_18	A stares down B, leans with hands on high stool (2 subjects - subject B)	Subject #23 (human interaction (2 subjects - subject B))
23_19	B stares down A, leans with hands on high stool (2 subjects - subject B)	Subject #23 (human interaction (2 subjects - subject B))
23_20	violence - A picks up high stool, threatens to strike B (2 subjects - subject B)	Subject #23 (human interaction (2 subjects - subject B))
23_21	conversation - B pounds high stool, points at A (2 subjects - subject B)	Subject #23 (human interaction (2 subjects - subject B))
23_22	walk; B catches keys thrown by A (2 subjects - subject B)	Subject #23 (human interaction (2 subjects - subject B))
23_23	walk; A catches keys thrown by B (2 subjects - subject B)	Subject #23 (human interaction (2 subjects - subject B))
23_24	walk; B catches wallet thrown by A (2 subjects - subject B)	Subject #23 (human interaction (2 subjects - subject B))
23_25	walk; A catches wallet thrown by B (2 subjects - subject B)	Subject #23 (human interaction (2 subjects - subject B))
24_01	nursery rhyme - "I'm a little teapot..."	Subject #24 (nursery rhymes)
25_01	nursery rhyme - "I'm a little teapot..."	Subject #25 (nursery rhymes)
26_01	walk	Subject #26 (nursery rhymes, basketball, bending)
26_02	basketball signals	Subject #26 (nursery rhymes, basketball, bending)
26_03	nursery rhyme - "I'm a little teapot..."	Subject #26 (nursery rhymes, basketball, bending)
26_04	nursery rhyme - "I'm a little teapot..."	Subject #26 (nursery rhymes, basketball, bending)
26_05	Alaska vacation	Subject #26 (nursery rhymes, basketball, bending)
26_06	Alaska vacation	Subject #26 (nursery rhymes, basketball, bending)
26_07	nursery rhyme - Cock Robin	Subject #26 (nursery rhymes, basketball, bending)
26_08	nursery rhyme - Cock Robin	Subject #26 (nursery rhymes, basketball, bending)
26_09	bend, pick up	Subject #26 (nursery rhymes, basketball, bending)
26_10	bend, lift	Subject #26 (nursery rhymes, basketball, bending)
26_11	bend, lift	Subject #26 (nursery rhymes, basketball, bending)
27_01	walk	Subject #27 (recreation, nursery rhymes)
27_02	basketball signals	Subject #27 (recreation, nursery rhymes)
27_03	nursery rhyme - "I'm a little teapot..."	Subject #27 (recreation, nursery rhymes)
27_04	Alaskan vacation	Subject #27 (recreation, nursery rhymes)
27_05	nursery rhyme - Cock Robin	Subject #27 (recreation, nursery rhymes)
27_06	basketball signals	Subject #27 (recreation, nursery rhymes)
27_07	nursery rhyme - "I'm a little teapot..."	Subject #27 (recreation, nursery rhymes)
27_08	Alaskan vacation	Subject #27 (recreation, nursery rhymes)
27_09	Alaskan vacation	Subject #27 (recreation, nursery rhymes)
27_10	nursery rhyme - Cock Robin	Subject #27 (recreation, nursery rhymes)
27_11	prairie dog (human subject)	Subject #27 (recreation, nursery rhymes)
28_01	basketball signals	Subject #28 (recreation, nursery rhymes, animal behaviors (pantomime - human subject))
28_02	nursery rhyme - "I'm a little teapot..."	Subject #28 (recreation, nursery rhymes, animal behaviors (pantomime - human subject))
28_03	Alaskan vacation	Subject #28 (recreation, nursery rhymes, animal behaviors (pantomime - human subject))
28_04	nursery rhyme - Cock Robin	Subject #28 (recreation, nursery rhymes, animal behaviors (pantomime - human subject))
28_05	basketball signals	Subject #28 (recreation, nursery rhymes, animal behaviors (pantomime - human subject))
28_06	nursery rhyme - "I'm a little teapot..."	Subject #28 (recreation, nursery rhymes, animal behaviors (pantomime - human subject))
28_07	Alaskan vacation	Subject #28 (recreation, nursery rhymes, animal behaviors (pantomime - human subject))
28_08	nursery rhyme - Cock Robin	Subject #28 (recreation, nursery rhymes, animal behaviors (pantomime - human subject))
28_09	prairie dog (human subject)	Subject #28 (recreation, nursery rhymes, animal behaviors (pantomime - human subject))
28_10	whale (human subject)	Subject #28 (recreation, nursery rhymes, animal behaviors (pantomime - human subject))
28_11	bear (human subject)	Subject #28 (recreation, nursery rhymes, animal behaviors (pantomime - human subject))
28_12	dog (human subject)	Subject #28 (recreation, nursery rhymes, animal behaviors (pantomime - human subject))
28_13	snake (human subject)	Subject #28 (recreation, nursery rhymes, animal behaviors (pantomime - human subject))
28_14	chicken (human subject)	Subject #28 (recreation, nursery rhymes, animal behaviors (pantomime - human subject))
28_15	monkey (human subject)	Subject #28 (recreation, nursery rhymes, animal behaviors (pantomime - human subject))
28_16	mouse (human subject)	Subject #28 (recreation, nursery rhymes, animal behaviors (pantomime - human subject))
28_17	cat (human subject)	Subject #28 (recreation, nursery rhymes, animal behaviors (pantomime - human subject))
28_18	elephant (human subject)	Subject #28 (recreation, nursery rhymes, animal behaviors (pantomime - human subject))
28_19	dinosaur (human subject)	Subject #28 (recreation, nursery rhymes, animal behaviors (pantomime - human subject))
29_01	walk	Subject #29 (recreation, nursery rhymes, animal behaviors (pantomime - human subject))
29_02	basketball signals	Subject #29 (recreation, nursery rhymes, animal behaviors (pantomime - human subject))
29_03	nursery rhyme - "I'm a little teapot..."	Subject #29 (recreation, nursery rhymes, animal behaviors (pantomime - human subject))
29_04	Alaskan vacation	Subject #29 (recreation, nursery rhymes, animal behaviors (pantomime - human subject))
29_05	Alaskan vacation	Subject #29 (recreation, nursery rhymes, animal behaviors (pantomime - human subject))
29_06	nursery rhyme - Cock Robin	Subject #29 (recreation, nursery rhymes, animal behaviors (pantomime - human subject))
29_07	basketball signals	Subject #29 (recreation, nursery rhymes, animal behaviors (pantomime - human subject))
29_08	nursery rhyme - "I'm a little teapot..."	Subject #29 (recreation, nursery rhymes, animal behaviors (pantomime - human subject))
29_09	Alaskan vacation	Subject #29 (recreation, nursery rhymes, animal behaviors (pantomime - human subject))
29_10	nursery rhyme - Cock Robin	Subject #29 (recreation, nursery rhymes, animal behaviors (pantomime - human subject))
29_11	Alaskan vacation	Subject #29 (recreation, nursery rhymes, animal behaviors (pantomime - human subject))
29_12	Alaskan vacation	Subject #29 (recreation, nursery rhymes, animal behaviors (pantomime - human subject))
29_13	Alaskan vacation	Subject #29 (recreation, nursery rhymes, animal behaviors (pantomime - human subject))
29_14	prairie dog (human subject)	Subject #29 (recreation, nursery rhymes, animal behaviors (pantomime - human subject))
29_15	whale (human subject)	Subject #29 (recreation, nursery rhymes, animal behaviors (pantomime - human subject))
29_16	bear (human subject)	Subject #29 (recreation, nursery rhymes, animal behaviors (pantomime - human subject))
29_17	dog (human subject)	Subject #29 (recreation, nursery rhymes, animal behaviors (pantomime - human subject))
29_18	cat (human subject)	Subject #29 (recreation, nursery rhymes, animal behaviors (pantomime - human subject))
29_19	fish (human subject)	Subject #29 (recreation, nursery rhymes, animal behaviors (pantomime - human subject))
29_20	elephant (human subject)	Subject #29 (recreation, nursery rhymes, animal behaviors (pantomime - human subject))
29_21	mouse (human subject)	Subject #29 (recreation, nursery rhymes, animal behaviors (pantomime - human subject))
29_22	chicken (human subject)	Subject #29 (recreation, nursery rhymes, animal behaviors (pantomime - human subject))
29_23	dinosaur (human subject)	Subject #29 (recreation, nursery rhymes, animal behaviors (pantomime - human subject))
29_24	snake (human subject)	Subject #29 (recreation, nursery rhymes, animal behaviors (pantomime - human subject))
29_25	monkey (human subject)	Subject #29 (recreation, nursery rhymes, animal behaviors (pantomime - human subject))
30_01	basketball signals	Subject #30 (recreation, nursery rhymes, animal behaviors (pantomime - human subject))
30_02	nursery rhyme - "I'm a little teapot..."	Subject #30 (recreation, nursery rhymes, animal behaviors (pantomime - human subject))
30_03	Alaskan vacation	Subject #30 (recreation, nursery rhymes, animal behaviors (pantomime - human subject))
30_04	Alaskan vacation	Subject #30 (recreation, nursery rhymes, animal behaviors (pantomime - human subject))
30_05	nursery rhyme - Cock Robin	Subject #30 (recreation, nursery rhymes, animal behaviors (pantomime - human subject))
30_06	nursery rhyme - Cock Robin	Subject #30 (recreation, nursery rhymes, animal behaviors (pantomime - human subject))
30_07	basketball signals	Subject #30 (recreation, nursery rhymes, animal behaviors (pantomime - human subject))
30_08	nursery rhyme - "I'm a little teapot..."	Subject #30 (recreation, nursery rhymes, animal behaviors (pantomime - human subject))
30_09	Alaskan vacation	Subject #30 (recreation, nursery rhymes, animal behaviors (pantomime - human subject))
30_10	nursery rhyme - Cock Robin	Subject #30 (recreation, nursery rhymes, animal behaviors (pantomime - human subject))
30_11	Alaskan vacation	Subject #30 (recreation, nursery rhymes, animal behaviors (pantomime - human subject))
30_12	Alaskan vacation	Subject #30 (recreation, nursery rhymes, animal behaviors (pantomime - human subject))
30_13	prairie dog (human subject)	Subject #30 (recreation, nursery rhymes, animal behaviors (pantomime - human subject))
30_14	whale (human subject)	Subject #30 (recreation, nursery rhymes, animal behaviors (pantomime - human subject))
30_15	bear (human subject)	Subject #30 (recreation, nursery rhymes, animal behaviors (pantomime - human subject))
30_16	dog (human subject)	Subject #30 (recreation, nursery rhymes, animal behaviors (pantomime - human subject))
30_17	cat (human subject)	Subject #30 (recreation, nursery rhymes, animal behaviors (pantomime - human subject))
30_18	elephant (human subject)	Subject #30 (recreation, nursery rhymes, animal behaviors (pantomime - human subject))
30_19	mouse (human subject)	Subject #30 (recreation, nursery rhymes, animal behaviors (pantomime - human subject))
30_20	chicken (human subject)	Subject #30 (recreation, nursery rhymes, animal behaviors (pantomime - human subject))
30_21	snake (human subject)	Subject #30 (recreation, nursery rhymes, animal behaviors (pantomime - human subject))
30_22	Tyrannosaurus rex (human subject)	Subject #30 (recreation, nursery rhymes, animal behaviors (pantomime - human subject))
30_23	monkey (human subject)	Subject #30 (recreation, nursery rhymes, animal behaviors (pantomime - human subject))
31_01	basketball signals	Subject #31 (recreation, nursery rhymes, animal behaviors (pantomime - human subject))
31_02	nursery rhyme - "I'm a little teapot..."	Subject #31 (recreation, nursery rhymes, animal behaviors (pantomime - human subject))
31_03	Alaskan vacation	Subject #31 (recreation, nursery rhymes, animal behaviors (pantomime - human subject))
31_04	nursery rhyme - Cock Robin	Subject #31 (recreation, nursery rhymes, animal behaviors (pantomime - human subject))
31_05	basketball signals	Subject #31 (recreation, nursery rhymes, animal behaviors (pantomime - human subject))
31_06	nursery rhyme - "I'm a little teapot..."	Subject #31 (recreation, nursery rhymes, animal behaviors (pantomime - human subject))
31_07	Alaskan vacation	Subject #31 (recreation, nursery rhymes, animal behaviors (pantomime - human subject))
31_08	nursery rhyme - Cock Robin	Subject #31 (recreation, nursery rhymes, animal behaviors (pantomime - human subject))
31_09	Alaskan vacation	Subject #31 (recreation, nursery rhymes, animal behaviors (pantomime - human subject))
31_10	Alaskan vacation	Subject #31 (recreation, nursery rhymes, animal behaviors (pantomime - human subject))
31_11	prairie dog (human subject)	Subject #31 (recreation, nursery rhymes, animal behaviors (pantomime - human subject))
31_12	whale (human subject)	Subject #31 (recreation, nursery rhymes, animal behaviors (pantomime - human subject))
31_13	bear (human subject)	Subject #31 (recreation, nursery rhymes, animal behaviors (pantomime - human subject))
31_14	dog (human subject)	Subject #31 (recreation, nursery rhymes, animal behaviors (pantomime - human subject))
31_15	cat (human subject)	Subject #31 (recreation, nursery rhymes, animal behaviors (pantomime - human subject))
31_16	elephant (human subject)	Subject #31 (recreation, nursery rhymes, animal behaviors (pantomime - human subject))
31_17	Tyrannosaurus rex (human subject)	Subject #31 (recreation, nursery rhymes, animal behaviors (pantomime - human subject))
31_18	mouse (human subject)	Subject #31 (recreation, nursery rhymes, animal behaviors (pantomime - human subject))
31_19	chicken (human subject)	Subject #31 (recreation, nursery rhymes, animal behaviors (pantomime - human subject))
31_20	snake (human subject)	Subject #31 (recreation, nursery rhymes, animal behaviors (pantomime - human subject))
31_21	monkey (human subject)	Subject #31 (recreation, nursery rhymes, animal behaviors (pantomime - human subject))
32_01	walk	Subject #32 (recreation, nursery rhymes, animal behaviors (pantomime - human subject))
32_02	walk	Subject #32 (recreation, nursery rhymes, animal behaviors (pantomime - human subject))
32_03	basketball signals	Subject #32 (recreation, nursery rhymes, animal behaviors (pantomime - human subject))
32_04	nursery rhyme - "I'm a little teapot..."	Subject #32 (recreation, nursery rhymes, animal behaviors (pantomime - human subject))
32_05	Alaskan vacation	Subject #32 (recreation, nursery rhymes, animal behaviors (pantomime - human subject))
32_06	nursery rhyme - Cock Robin	Subject #32 (recreation, nursery rhymes, animal behaviors (pantomime - human subject))
32_07	basketball signals	Subject #32 (recreation, nursery rhymes, animal behaviors (pantomime - human subject))
32_08	nursery rhyme - "I'm a little teapot..."	Subject #32 (recreation, nursery rhymes, animal behaviors (pantomime - human subject))
32_09	Alaskan vacation	Subject #32 (recreation, nursery rhymes, animal behaviors (pantomime - human subject))
32_10	nursery rhyme - Cock Robin	Subject #32 (recreation, nursery rhymes, animal behaviors (pantomime - human subject))
32_11	Alaskan vacation	Subject #32 (recreation, nursery rhymes, animal behaviors (pantomime - human subject))
32_12	Alaskan vacation	Subject #32 (recreation, nursery rhymes, animal behaviors (pantomime - human subject))
32_13	prairie dog (human subject)	Subject #32 (recreation, nursery rhymes, animal behaviors (pantomime - human subject))
32_14	bear (human subject)	Subject #32 (recreation, nursery rhymes, animal behaviors (pantomime - human subject))
32_15	dog (human subject)	Subject #32 (recreation, nursery rhymes, animal behaviors (pantomime - human subject))
32_16	cat (human subject)	Subject #32 (recreation, nursery rhymes, animal behaviors (pantomime - human subject))
32_17	elephant (human subject)	Subject #32 (recreation, nursery rhymes, animal behaviors (pantomime - human subject))
32_18	mouse (human subject)	Subject #32 (recreation, nursery rhymes, animal behaviors (pantomime - human subject))
32_19	chicken (human subject)	Subject #32 (recreation, nursery rhymes, animal behaviors (pantomime - human subject))
32_20	Tyrannosaurus rex (human subject)	Subject #32 (recreation, nursery rhymes, animal behaviors (pantomime - human subject))
32_21	snake (human subject)	Subject #32 (recreation, nursery rhymes, animal behaviors (pantomime - human subject))
32_22	monkey (human subject)	Subject #32 (recreation, nursery rhymes, animal behaviors (pantomime - human subject))
33_01	football - throw, catch (2 subjects - subject A)	Subject #33 (throw and catch football (2 subjects - subject A))
33_02	football - throw, catch, jump around (2 subjects - subject A)	Subject #33 (throw and catch football (2 subjects - subject A))
34_01	football - throw, catch (2 subjects - subject B)	Subject #34 (throw and catch football (2 subjects - subject B))
34_02	football - throw, catch, jump around (2 subjects - subject B)	Subject #34 (throw and catch football (2 subjects - subject B))
35_01	walk	Subject #35 (walk, run)
35_02	walk	Subject #35 (walk, run)
35_03	walk	Subject #35 (walk, run)
35_04	walk	Subject #35 (walk, run)
35_05	walk	Subject #35 (walk, run)
35_06	walk	Subject #35 (walk, run)
35_07	walk	Subject #35 (walk, run)
35_08	walk	Subject #35 (walk, run)
35_09	walk	Subject #35 (walk, run)
35_10	walk	Subject #35 (walk, run)
35_11	walk	Subject #35 (walk, run)
35_12	walk	Subject #35 (walk, run)
35_13	walk	Subject #35 (walk, run)
35_14	walk	Subject #35 (walk, run)
35_15	walk	Subject #35 (walk, run)
35_16	walk	Subject #35 (walk, run)
35_17	run/jog	Subject #35 (walk, run)
35_18	run/jog	Subject #35 (walk, run)
35_19	run/jog	Subject #35 (walk, run)
35_20	run/jog	Subject #35 (walk, run)
35_21	run/jog	Subject #35 (walk, run)
35_22	run/jog	Subject #35 (walk, run)
35_23	run/jog	Subject #35 (walk, run)
35_24	run/jog	Subject #35 (walk, run)
35_25	run/jog	Subject #35 (walk, run)
35_26	run/jog	Subject #35 (walk, run)
35_27	navigate around obstacles	Subject #35 (walk, run)
35_28	walk	Subject #35 (walk, run)
35_29	walk	Subject #35 (walk, run)
35_30	walk	Subject #35 (walk, run)
35_31	walk	Subject #35 (walk, run)
35_32	walk	Subject #35 (walk, run)
35_33	walk	Subject #35 (walk, run)
35_34	walk	Subject #35 (walk, run)
36_01	walk on uneven terrain	Subject #36 (walk on uneven terrain)
36_02	walk forward, turn around, walk back	Subject #36 (walk on uneven terrain)
36_03	walk forward, turn around, walk back	Subject #36 (walk on uneven terrain)
36_04	walk on uneven terrain	Subject #36 (walk on uneven terrain)
36_05	walk on uneven terrain	Subject #36 (walk on uneven terrain)
36_06	walk on uneven terrain	Subject #36 (walk on uneven terrain)
36_07	walk on uneven terrain	Subject #36 (walk on uneven terrain)
36_08	walk on uneven terrain	Subject #36 (walk on uneven terrain)
36_09	walk forward, turn around, walk back	Subject #36 (walk on uneven terrain)
36_10	walk on uneven terrain	Subject #36 (walk on uneven terrain)
36_11	walk on uneven terrain	Subject #36 (walk on uneven terrain)
36_12	walk on uneven terrain	Subject #36 (walk on uneven terrain)
36_13	walk on uneven terrain	Subject #36 (walk on uneven terrain)
36_14	walk on uneven terrain	Subject #36 (walk on uneven terrain)
36_15	walk on uneven terrain	Subject #36 (walk on uneven terrain)
36_16	walk on uneven terrain	Subject #36 (walk on uneven terrain)
36_17	walk on uneven terrain	Subject #36 (walk on uneven terrain)
36_18	walk on uneven terrain	Subject #36 (walk on uneven terrain)
36_19	walk on uneven terrain	Subject #36 (walk on uneven terrain)
36_20	walk on uneven terrain	Subject #36 (walk on uneven terrain)
36_21	walk on uneven terrain	Subject #36 (walk on uneven terrain)
36_22	walk on uneven terrain	Subject #36 (walk on uneven terrain)
36_23	walk on uneven terrain	Subject #36 (walk on uneven terrain)
36_24	walk on uneven terrain	Subject #36 (walk on uneven terrain)
36_25	walk on uneven terrain	Subject #36 (walk on uneven terrain)
36_26	walk on uneven terrain	Subject #36 (walk on uneven terrain)
36_27	walk on uneven terrain	Subject #36 (walk on uneven terrain)
36_28	walk on uneven terrain	Subject #36 (walk on uneven terrain)
36_29	walk on uneven terrain	Subject #36 (walk on uneven terrain)
36_30	walk on uneven terrain	Subject #36 (walk on uneven terrain)
36_31	walk on uneven terrain	Subject #36 (walk on uneven terrain)
36_32	walk on uneven terrain	Subject #36 (walk on uneven terrain)
36_33	walk on uneven terrain	Subject #36 (walk on uneven terrain)
36_34	walk on uneven terrain	Subject #36 (walk on uneven terrain)
36_35	walk on uneven terrain	Subject #36 (walk on uneven terrain)
36_36	walk on uneven terrain	Subject #36 (walk on uneven terrain)
36_37	jump/hop on uneven terrain	Subject #36 (walk on uneven terrain)
37_01	slow walk	Subject #37 (walk)
38_01	walk	Subject #38 (walk, run)
38_02	walk	Subject #38 (walk, run)
38_03	run around in a circle	Subject #38 (walk, run)
38_04	walk around, frequent turns, cyclic walk along a line	Subject #38 (walk, run)
39_01	walk	Subject #39 (climb, swing, hang on playground equipment)
39_02	walk	Subject #39 (climb, swing, hang on playground equipment)
39_03	walk	Subject #39 (climb, swing, hang on playground equipment)
39_04	walk	Subject #39 (climb, swing, hang on playground equipment)
39_05	walk	Subject #39 (climb, swing, hang on playground equipment)
39_06	walk	Subject #39 (climb, swing, hang on playground equipment)
39_07	walk	Subject #39 (climb, swing, hang on playground equipment)
39_08	walk	Subject #39 (climb, swing, hang on playground equipment)
39_09	walk	Subject #39 (climb, swing, hang on playground equipment)
39_10	walk	Subject #39 (climb, swing, hang on playground equipment)
39_11	walk forward, turn around, walk back	Subject #39 (climb, swing, hang on playground equipment)
39_12	walk	Subject #39 (climb, swing, hang on playground equipment)
39_13	walk	Subject #39 (climb, swing, hang on playground equipment)
39_14	walk	Subject #39 (climb, swing, hang on playground equipment)
40_02	navigate - walk forward, backward, on a diagonal	Subject #40 (navigate from corner to corner, interact with stepstool)
40_03	navigate - walk forward, backward, on a diagonal	Subject #40 (navigate from corner to corner, interact with stepstool)
40_04	navigate - walk forward, backward, on a diagonal	Subject #40 (navigate from corner to corner, interact with stepstool)
40_05	navigate - walk forward, backward, on a diagonal	Subject #40 (navigate from corner to corner, interact with stepstool)
40_06	climb, step over, sit on, jump over stepstool	Subject #40 (navigate from corner to corner, interact with stepstool)
40_07	climb, step over, jump over stepstool	Subject #40 (navigate from corner to corner, interact with stepstool)
40_08	climb, step over, jump over stepstool	Subject #40 (navigate from corner to corner, interact with stepstool)
40_09	climb, step over, jump over stepstool	Subject #40 (navigate from corner to corner, interact with stepstool)
40_10	wait for bus	Subject #40 (navigate from corner to corner, interact with stepstool)
40_11	wait for bus	Subject #40 (navigate from corner to corner, interact with stepstool)
40_12	basketball signals	Subject #40 (navigate from corner to corner, interact with stepstool)
41_02	navigate - walk forward, backward, sideways, on a diagonal	Subject #41 (navigate from corner to corner, interact with stepstool)
41_03	navigate - walk forward, backward, sideways, on a diagonal	Subject #41 (navigate from corner to corner, interact with stepstool)
41_04	navigate - walk forward, backward, on a diagonal	Subject #41 (navigate from corner to corner, interact with stepstool)
41_05	navigate - walk forward, backward, on a diagonal	Subject #41 (navigate from corner to corner, interact with stepstool)
41_06	navigate - walk forward, backward, on a diagonal	Subject #41 (navigate from corner to corner, interact with stepstool)
41_07	climb, step over, jump over, navigate around stepstool	Subject #41 (navigate from corner to corner, interact with stepstool)
41_08	climb, step over, jump over, navigate around stepstool	Subject #41 (navigate from corner to corner, interact with stepstool)
41_09	climb, step over, jump over, navigate around stepstool	Subject #41 (navigate from corner to corner, interact with stepstool)
41_10	basketball signals	Subject #41 (navigate from corner to corner, interact with stepstool)
41_11	basketball signals	Subject #41 (navigate from corner to corner, interact with stepstool)
42_01	stretch - rotate head, shoulders, arms, legs	Subject #42 (stretch)
43_01	walk	Subject #43 (swing on playground equipment)
43_02	playground - grip bar, swing body	Subject #43 (swing on playground equipment)
43_03	playground - grip bar, swing body	Subject #43 (swing on playground equipment)
45_01	walk	Subject #45 (walk)
46_01	walk	Subject #46 (walk)
47_01	walk forward, turn around, walk back	Subject #47 (walk)
49_01	walk	Subject #49 (modern dance, gymnastics)
49_02	jump up and down, hop on one foot	Subject #49 (modern dance, gymnastics)
49_03	jump up and down, hop on one foot	Subject #49 (modern dance, gymnastics)
49_04	run, leap	Subject #49 (modern dance, gymnastics)
49_05	run, leap	Subject #49 (modern dance, gymnastics)
49_06	cartwheel	Subject #49 (modern dance, gymnastics)
49_07	cartwheel	Subject #49 (modern dance, gymnastics)
49_08	cartwheels	Subject #49 (modern dance, gymnastics)
49_09	dance - arms held high, side arabesque	Subject #49 (modern dance, gymnastics)
49_10	dance - fold in from side arabesque, curl inwards	Subject #49 (modern dance, gymnastics)
49_11	dance - fold in from side arabesque, curl inwards	Subject #49 (modern dance, gymnastics)
49_12	dance - lean forward, bring back leg forward, arching arms	Subject #49 (modern dance, gymnastics)
49_13	dance - fold in from side arabesque, curl inwards	Subject #49 (modern dance, gymnastics)
49_14	dance - lean forward, bring back leg forward, arching arms	Subject #49 (modern dance, gymnastics)
49_15	static dance pose - folded in, head lowered, leg bent	Subject #49 (modern dance, gymnastics)
49_16	dance - fold in from side arabesque, curl inwards	Subject #49 (modern dance, gymnastics)
49_17	dance - lean forward, bring back leg forward, arching arms	Subject #49 (modern dance, gymnastics)
49_18	balance on one leg, outstretched arms	Subject #49 (modern dance, gymnastics)
49_19	balance on one leg, outstretched arms	Subject #49 (modern dance, gymnastics)
49_20	balance on one leg, outstretched arms	Subject #49 (modern dance, gymnastics)
49_21	acrobatics - spin/twirl, hang on ropes	Subject #49 (modern dance, gymnastics)
49_22	dance - lean back on bent leg, balance, bend elbow by ear	Subject #49 (modern dance, gymnastics)
54_01	monkey (human subject)	Subject #54 (animal behaviors (pantomime - human subject))
54_02	bear (human subject)	Subject #54 (animal behaviors (pantomime - human subject))
54_03	penguin (human subject)	Subject #54 (animal behaviors (pantomime - human subject))
54_04	pterosaur (human subject)	Subject #54 (animal behaviors (pantomime - human subject))
54_05	pterosaur (human subject)	Subject #54 (animal behaviors (pantomime - human subject))
54_06	pterosaur (human subject)	Subject #54 (animal behaviors (pantomime - human subject))
54_07	prairie dog (human subject)	Subject #54 (animal behaviors (pantomime - human subject))
54_08	roadrunner (human subject)	Subject #54 (animal behaviors (pantomime - human subject))
54_09	insect/praying mantis (human subject)	Subject #54 (animal behaviors (pantomime - human subject))
54_10	ghost (human subject)	Subject #54 (animal behaviors (pantomime - human subject))
54_11	penguin (human subject)	Subject #54 (animal behaviors (pantomime - human subject))
54_12	dragon (human subject)	Subject #54 (animal behaviors (pantomime - human subject))
54_13	dragon (human subject)	Subject #54 (animal behaviors (pantomime - human subject))
54_14	monkey (human subject)	Subject #54 (animal behaviors (pantomime - human subject))
54_15	prairie dog (human subject)	Subject #54 (animal behaviors (pantomime - human subject))
54_16	superhero	Subject #54 (animal behaviors (pantomime - human subject))
54_17	squirrel (human subject)	Subject #54 (animal behaviors (pantomime - human subject))
54_18	squirrel (human subject)	Subject #54 (animal behaviors (pantomime - human subject))
54_19	squirrel - robotic like motion (human subject)	Subject #54 (animal behaviors (pantomime - human subject))
54_20	follow path, walk around obstacles	Subject #54 (animal behaviors (pantomime - human subject))
54_21	follow path, walk around obstacles	Subject #54 (animal behaviors (pantomime - human subject))
54_22	follow path, walk around obstacles	Subject #54 (animal behaviors (pantomime - human subject))
54_23	monkey (human subject)	Subject #54 (animal behaviors (pantomime - human subject))
54_24	hummingbird (human subject)	Subject #54 (animal behaviors (pantomime - human subject))
54_25	chicken (human subject)	Subject #54 (animal behaviors (pantomime - human subject))
54_26	chicken (human subject)	Subject #54 (animal behaviors (pantomime - human subject))
54_27	chicken (human subject)	Subject #54 (animal behaviors (pantomime - human subject))
55_01	dance, whirl	Subject #55 (animal behaviors (pantomime - human subject))
55_02	lambada dance	Subject #55 (animal behaviors (pantomime - human subject))
55_03	genie (human subject)	Subject #55 (animal behaviors (pantomime - human subject))
55_04	walk	Subject #55 (animal behaviors (pantomime - human subject))
55_05	hummingbird (human subject)	Subject #55 (animal behaviors (pantomime - human subject))
55_06	chicken (human subject)	Subject #55 (animal behaviors (pantomime - human subject))
55_07	chicken (human subject)	Subject #55 (animal behaviors (pantomime - human subject))
55_08	monkey (human subject)	Subject #55 (animal behaviors (pantomime - human subject))
55_09	monkey (human subject)	Subject #55 (animal behaviors (pantomime - human subject))
55_10	hummingbird (human subject)	Subject #55 (animal behaviors (pantomime - human subject))
55_11	animal (human subject)	Subject #55 (animal behaviors (pantomime - human subject))
55_12	dancing bear (human subject)	Subject #55 (animal behaviors (pantomime - human subject))
55_13	insect/praying mantis (human subject)	Subject #55 (animal behaviors (pantomime - human subject))
55_14	prairie dog (human subject)	Subject #55 (animal behaviors (pantomime - human subject))
55_15	roadrunner (human subject)	Subject #55 (animal behaviors (pantomime - human subject))
55_16	panda (human subject)	Subject #55 (animal behaviors (pantomime - human subject))
55_17	ghost (human subject)	Subject #55 (animal behaviors (pantomime - human subject))
55_18	penguin (human subject)	Subject #55 (animal behaviors (pantomime - human subject))
55_19	dragon (human subject)	Subject #55 (animal behaviors (pantomime - human subject))
55_20	hippo ballerina (human subject)	Subject #55 (animal behaviors (pantomime - human subject))
55_21	pterosaur (human subject)	Subject #55 (animal behaviors (pantomime - human subject))
55_22	superhero	Subject #55 (animal behaviors (pantomime - human subject))
55_23	devil	Subject #55 (animal behaviors (pantomime - human subject))
55_24	various animals (human subject)	Subject #55 (animal behaviors (pantomime - human subject))
55_25	dancing animal (human subject)	Subject #55 (animal behaviors (pantomime - human subject))
55_26	monkey (human subject)	Subject #55 (animal behaviors (pantomime - human subject))
55_27	dancing ant (human subject)	Subject #55 (animal behaviors (pantomime - human subject))
55_28	monkey/bear (human subject)	Subject #55 (animal behaviors (pantomime - human subject))
56_01	walk around	Subject #56 (vignettes - locomotion, upper-body motions (focus: motion transitions))
56_02	vignettes - fists up, wipe window, yawn, stretch, angrily grab, smash against wall	Subject #56 (vignettes - locomotion, upper-body motions (focus: motion transitions))
56_03	vignettes - fists up, wipe window, yawn, stretch, angrily grab, smash against wall, lift open window, throw punches, skip	Subject #56 (vignettes - locomotion, upper-body motions (focus: motion transitions))
56_04	vignettes - fists up, wipe window, grab, lift open window, throw punches, yawn, stretch, walk, jump	Subject #56 (vignettes - locomotion, upper-body motions (focus: motion transitions))
56_05	vignettes - walk, drink water, run/jog, jump, wipe window, lift open window, throw punches, yawn, stretch	Subject #56 (vignettes - locomotion, upper-body motions (focus: motion transitions))
56_06	vignettes - throw punches, grab, skip, yawn, stretch, leap, lift open window, walk, jump/bound	Subject #56 (vignettes - locomotion, upper-body motions (focus: motion transitions))
56_07	vignettes - yawn, stretch, walk, run/jog, angrily grab, jump, skip, halt	Subject #56 (vignettes - locomotion, upper-body motions (focus: motion transitions))
56_08	vignettes - lift open window, smash against wall, hop, walk, run/jog, yawn, stretch	Subject #56 (vignettes - locomotion, upper-body motions (focus: motion transitions))
60_01	salsa dance	Subject #60 (salsa)
60_02	salsa dance	Subject #60 (salsa)
60_03	salsa dance	Subject #60 (salsa)
60_04	salsa dance	Subject #60 (salsa)
60_05	salsa dance	Subject #60 (salsa)
60_06	salsa dance	Subject #60 (salsa)
60_07	salsa dance	Subject #60 (salsa)
60_08	salsa dance	Subject #60 (salsa)
60_09	salsa dance	Subject #60 (salsa)
60_10	salsa dance	Subject #60 (salsa)
60_11	salsa dance	Subject #60 (salsa)
60_12	salsa dance	Subject #60 (salsa)
60_13	salsa dance	Subject #60 (salsa)
60_14	salsa dance	Subject #60 (salsa)
60_15	salsa dance	Subject #60 (salsa)
61_01	salsa dance	Subject #61 (salsa)
61_02	salsa dance	Subject #61 (salsa)
61_03	salsa dance	Subject #61 (salsa)
61_04	salsa dance	Subject #61 (salsa)
61_05	salsa dance	Subject #61 (salsa)
61_06	salsa dance	Subject #61 (salsa)
61_07	salsa dance	Subject #61 (salsa)
61_08	salsa dance	Subject #61 (salsa)
61_09	salsa dance	Subject #61 (salsa)
61_10	salsa dance	Subject #61 (salsa)
61_11	salsa dance	Subject #61 (salsa)
61_12	salsa dance	Subject #61 (salsa)
61_13	salsa dance	Subject #61 (salsa)
61_14	salsa dance	Subject #61 (salsa)
61_15	salsa dance	Subject #61 (salsa)
62_01	bolt loosening, wrench	Subject #62 (construction work, random motions)
62_02	bolt tightening, wrench	Subject #62 (construction work, random motions)
62_03	sawing, hand saw	Subject #62 (construction work, random motions)
62_04	screwing	Subject #62 (construction work, random motions)
62_05	screwing	Subject #62 (construction work, random motions)
62_06	unscrewing	Subject #62 (construction work, random motions)
62_07	hammering a nail	Subject #62 (construction work, random motions)
62_08	hammering a nail	Subject #62 (construction work, random motions)
62_09	pulling a nail	Subject #62 (construction work, random motions)
62_10	hammering sequence	Subject #62 (construction work, random motions)
62_11	cleaning up	Subject #62 (construction work, random motions)
62_12	hard days drink	Subject #62 (construction work, random motions)
62_13	moving a stool	Subject #62 (construction work, random motions)
62_14	opening umbrella	Subject #62 (construction work, random motions)
62_15	opening umbrella	Subject #62 (construction work, random motions)
62_16	closing umbrella	Subject #62 (construction work, random motions)
62_17	opening and closing umbrella	Subject #62 (construction work, random motions)
62_18	closing a box	Subject #62 (construction work, random motions)
62_19	opening a box	Subject #62 (construction work, random motions)
62_20	closing, moving and opening a box	Subject #62 (construction work, random motions)
62_21	coiling a rope	Subject #62 (construction work, random motions)
62_22	dynamic calibration	Subject #62 (construction work, random motions)
62_23	bolt tightening	Subject #62 (construction work, random motions)
62_24	bolt tightening, with putting bolt in	Subject #62 (construction work, random motions)
62_25	bolt loosening, wrench	Subject #62 (construction work, random motions)
63_01	Swing	Subject #63 (golf)
64_01	Swing	Subject #64 (golf)
64_02	Swing	Subject #64 (golf)
64_03	Swing	Subject #64 (golf)
64_04	Swing	Subject #64 (golf)
64_05	Swing	Subject #64 (golf)
64_06	Swing	Subject #64 (golf)
64_07	Swing	Subject #64 (golf)
64_08	Swing	Subject #64 (golf)
64_09	Swing	Subject #64 (golf)
64_10	Swing	Subject #64 (golf)
64_11	Putt	Subject #64 (golf)
64_12	Putt	Subject #64 (golf)
64_13	Putt	Subject #64 (golf)
64_14	Putt	Subject #64 (golf)
64_15	Putt	Subject #64 (golf)
64_16	Placing Tee	Subject #64 (golf)
64_17	Placing Tee	Subject #64 (golf)
64_18	Placing Tee	Subject #64 (golf)
64_19	Placing Tee	Subject #64 (golf)
64_20	Placing Tee	Subject #64 (golf)
64_21	Placing Ball	Subject #64 (golf)
64_22	Placing Ball	Subject #64 (golf)
64_23	Placing Ball	Subject #64 (golf)
64_24	Placing Ball	Subject #64 (golf)
64_25	Placing Ball	Subject #64 (golf)
64_26	Picking up Ball	Subject #64 (golf)
64_27	Picking up Ball	Subject #64 (golf)
64_28	Picking up Ball	Subject #64 (golf)
64_29	Picking up Ball	Subject #64 (golf)
64_30	Picking up Ball	Subject #64 (golf)
69_01	walk forward	Subject #69 (walking)
69_02	walk forward	Subject #69 (walking)
69_03	walk forward	Subject #69 (walking)
69_04	walk forward	Subject #69 (walking)
69_05	walk forward	Subject #69 (walking)
69_06	walk and turn (repeated)	Subject #69 (walking)
69_07	walk and turn (repeated)	Subject #69 (walking)
69_08	walk and turn (repeated)	Subject #69 (walking)
69_09	walk and turn (repeated)	Subject #69 (walking)
69_10	walk and turn (repeated)	Subject #69 (walking)
69_11	walk and turn (repeated)	Subject #69 (walking)
69_12	walk and turn both directions (repeated)	Subject #69 (walking)
69_13	walk, turn in place (repeated)	Subject #69 (walking)
69_14	walk, turn in place (repeated)	Subject #69 (walking)
69_15	walk, turn in place (repeated)	Subject #69 (walking)
69_16	turn in place	Subject #69 (walking)
69_17	turn in place	Subject #69 (walking)
69_18	turn in place (opposite direction)	Subject #69 (walking)
69_19	turn in place (opposite direction)	Subject #69 (walking)
69_20	walk forward 90 degree right turn	Subject #69 (walking)
69_21	walk forward 90 degree right turn	Subject #69 (walking)
69_22	walk forward 90 degree right turn	Subject #69 (walking)
69_23	walk forward 90 degree right turn	Subject #69 (walking)
69_24	walk forward 90 degree left turn	Subject #69 (walking)
69_25	walk forward 90 degree left turn	Subject #69 (walking)
69_26	walk forward 90 degree left turn	Subject #69 (walking)
69_27	walk forward 90 degree left turn	Subject #69 (walking)
69_28	walk forward 90 degree smooth right turn	Subject #69 (walking)
69_29	walk forward 90 degree smooth right turn	Subject #69 (walking)
69_30	walk forward 90 degree smooth right turn	Subject #69 (walking)
69_31	walk forward 90 degree smooth left turn	Subject #69 (walking)
69_32	walk forward 90 degree smooth left turn	Subject #69 (walking)
69_33	walk forward 90 degree smooth left turn	Subject #69 (walking)
69_34	walk backwards and turn	Subject #69 (walking)
69_35	walk backwards and turn	Subject #69 (walking)
69_36	walk backwards and turn	Subject #69 (walking)
69_37	walk backwards and turn	Subject #69 (walking)
69_38	walk backwards and turn (repeated)	Subject #69 (walking)
69_39	walk backward, turn in place	Subject #69 (walking)
69_40	walk backward, turn in place	Subject #69 (walking)
69_41	walk backward, turn in place	Subject #69 (walking)
69_42	walk sideways and turn (repeated)	Subject #69 (walking)
69_43	walk sideways and turn (repeated)	Subject #69 (walking)
69_44	walk sideways and turn (repeated)	Subject #69 (walking)
69_45	walk sideways and turn (repeated)	Subject #69 (walking)
69_46	walk sideways and turn (repeated)	Subject #69 (walking)
69_47	walk sideways and turn (repeated)	Subject #69 (walking)
69_48	walk sideways and turn (opposite direction)	Subject #69 (walking)
69_49	walk sideways and turn (opposite direction)	Subject #69 (walking)
69_50	walk sideways and backwards	Subject #69 (walking)
69_51	walk backwards and turn	Subject #69 (walking)
69_52	walk backwards and turn	Subject #69 (walking)
69_53	walk backwards and turn	Subject #69 (walking)
69_54	walk backwards and turn	Subject #69 (walking)
69_55	walk backwards and turn	Subject #69 (walking)
69_56	walk sideways and turn (opposite direction)	Subject #69 (walking)
69_57	walk sideways and turn (opposite direction)	Subject #69 (walking)
69_58	walk sideways and turn (opposite direction)	Subject #69 (walking)
69_59	walk sideways and turn	Subject #69 (walking)
69_60	walk sideways and turn	Subject #69 (walking)
69_61	walk sideways and turn	Subject #69 (walking)
69_62	walk sideways and turn (opposite direction)	Subject #69 (walking)
69_63	walk sideways and turn (opposite direction)	Subject #69 (walking)
69_64	walk sideways and turn (opposite direction)	Subject #69 (walking)
69_65	walk sideways and turn	Subject #69 (walking)
69_66	walk sideways and turn	Subject #69 (walking)
69_67	walk sideways and turn	Subject #69 (walking)
69_68	walk forward and pick up object, set down object	Subject #69 (walking)
69_69	walk forward and pick up object, carry back object	Subject #69 (walking)
69_70	walk up to object, squat, pick up object, set down in another place.	Subject #69 (walking)
69_71	walk up to object, squat, pick up object, set down in another place	Subject #69 (walking)
69_72	walk up to object, pick up object, set down in another place	Subject #69 (walking)
69_73	walk up to object, lean over, pick up object, set down in another place	Subject #69 (walking)
69_74	walk up to object, lean over, pick up object, set down in another place	Subject #69 (walking)
69_75	walk up to object, squat, pick up object, set down in another place	Subject #69 (walking)
70_01	carry 5.5lb suitcase	Subject #70 (suitcase)
70_02	carry 5.5lb suitcase	Subject #70 (suitcase)
70_03	carry 19.5lb suitcase	Subject #70 (suitcase)
70_04	carry 19.5lb suitcase	Subject #70 (suitcase)
70_05	carry 19.5lb suitcase	Subject #70 (suitcase)
70_06	carry 19.5lb suitcase	Subject #70 (suitcase)
70_07	carry 19.5lb suitcase	Subject #70 (suitcase)
70_08	carry 19.5lb suitcase	Subject #70 (suitcase)
70_09	carry 19.5lb suitcase	Subject #70 (suitcase)
70_10	carry 12.5lb suitcase	Subject #70 (suitcase)
70_11	carry 12.5lb suitcase	Subject #70 (suitcase)
70_12	carry 12.5lb suitcase	Subject #70 (suitcase)
70_13	carry 12.5lb suitcase	Subject #70 (suitcase)
74_01	stiff walk	Subject #74 (kicks and walking on slopes)
74_02	stiff walk	Subject #74 (kicks and walking on slopes)
74_03	kick	Subject #74 (kicks and walking on slopes)
74_04	kick	Subject #74 (kicks and walking on slopes)
74_05	kick	Subject #74 (kicks and walking on slopes)
74_06	kick	Subject #74 (kicks and walking on slopes)
74_07	lifting up	Subject #74 (kicks and walking on slopes)
74_08	lifting up	Subject #74 (kicks and walking on slopes)
74_09	Unknown	Subject #74 (kicks and walking on slopes)
74_10	peeping	Subject #74 (kicks and walking on slopes)
74_11	peeping	Subject #74 (kicks and walking on slopes)
74_12	thinker	Subject #74 (kicks and walking on slopes)
74_13	Range of motion	Subject #74 (kicks and walking on slopes)
74_14	slope 1	Subject #74 (kicks and walking on slopes)
74_15	slope1	Subject #74 (kicks and walking on slopes)
74_16	slope 2	Subject #74 (kicks and walking on slopes)
74_17	slope 2	Subject #74 (kicks and walking on slopes)
74_18	slope 3	Subject #74 (kicks and walking on slopes)
74_19	slope 3	Subject #74 (kicks and walking on slopes)
74_20	stiff walk	Subject #74 (kicks and walking on slopes)
75_01	run jump	Subject #75 (jumps; hopscotch; sits)
75_02	run jump	Subject #75 (jumps; hopscotch; sits)
75_03	run jump	Subject #75 (jumps; hopscotch; sits)
75_04	wide leg run	Subject #75 (jumps; hopscotch; sits)
75_05	cross leg run	Subject #75 (jumps; hopscotch; sits)
75_06	180 jump	Subject #75 (jumps; hopscotch; sits)
75_07	angle jumps	Subject #75 (jumps; hopscotch; sits)
75_08	360 jumps	Subject #75 (jumps; hopscotch; sits)
75_09	360 jump	Subject #75 (jumps; hopscotch; sits)
75_10	2 jump	Subject #75 (jumps; hopscotch; sits)
75_11	2 jump	Subject #75 (jumps; hopscotch; sits)
75_12	box jump	Subject #75 (jumps; hopscotch; sits)
75_13	hopscotch	Subject #75 (jumps; hopscotch; sits)
75_14	hopscotch	Subject #75 (jumps; hopscotch; sits)
75_15	long jumps	Subject #75 (jumps; hopscotch; sits)
75_16	jump kick	Subject #75 (jumps; hopscotch; sits)
75_17	medium sit	Subject #75 (jumps; hopscotch; sits)
75_18	high sit	Subject #75 (jumps; hopscotch; sits)
75_19	medium sit	Subject #75 (jumps; hopscotch; sits)
75_20	low sit	Subject #75 (jumps; hopscotch; sits)
76_01	walk backwards then attack with a punch	Subject #76 (avoidance)
76_02	walk backwards, feign a few attacks, then attack	Subject #76 (avoidance)
76_03	avoid attacker	Subject #76 (avoidance)
76_04	defensive guard pose	Subject #76 (avoidance)
76_05	swatting at pesky bug	Subject #76 (avoidance)
76_06	avoid stepping on something	Subject #76 (avoidance)
76_07	Unknown	Subject #76 (avoidance)
76_08	careful stepping over things	Subject #76 (avoidance)
76_09	walking backwards	Subject #76 (avoidance)
76_10	turning	Subject #76 (avoidance)
76_11	quick large steps backwards	Subject #76 (avoidance)
77_01	looking around	Subject #77 (careful actions)
77_02	standing	Subject #77 (careful actions)
77_03	ready stance	Subject #77 (careful actions)
77_04	Looking around	Subject #77 (careful actions)
77_05	look around with flashlight	Subject #77 (careful actions)
77_06	searching ground	Subject #77 (careful actions)
77_07	poking ground	Subject #77 (careful actions)
77_08	investigating thing on ground with two hands	Subject #77 (careful actions)
77_09	duck to avoid flying object	Subject #77 (careful actions)
77_10	careful run	Subject #77 (careful actions)
77_11	careful run	Subject #77 (careful actions)
77_12	careful run in circle	Subject #77 (careful actions)
77_13	careful run in figure eight	Subject #77 (careful actions)
77_14	careful creeping	Subject #77 (careful actions)
77_15	careful creeping	Subject #77 (careful actions)
77_16	laying down, getting up, careful ready pose	Subject #77 (careful actions)
77_17	laying down, getting up, careful ready pose	Subject #77 (careful actions)
77_18	laying down on back, getting up, careful ready pose	Subject #77 (careful actions)
77_19	limping, hurt right leg	Subject #77 (careful actions)
77_20	limping, hurt right leg	Subject #77 (careful actions)
77_21	stretching	Subject #77 (careful actions)
77_22	limping, hurt right leg	Subject #77 (careful actions)
77_23	limping, hurt right leg	Subject #77 (careful actions)
77_24	limping, hurt right leg	Subject #77 (careful actions)
77_25	careful walk and search	Subject #77 (careful actions)
77_26	careful walk and search	Subject #77 (careful actions)
77_27	careful walk and search	Subject #77 (careful actions)
77_28	careful walk	Subject #77 (careful actions)
77_29	creeping walk	Subject #77 (careful actions)
77_30	creeping walk	Subject #77 (careful actions)
77_31	silent walk	Subject #77 (careful actions)
77_32	creeping walk	Subject #77 (careful actions)
77_33	creeping with limp	Subject #77 (careful actions)
77_34	creep and pause, repeat	Subject #77 (careful actions)
78_01	LeftTightTurn CleanedGRS	Subject #78 (walking)
78_02	RightWideTurn CleanedGRS	Subject #78 (walking)
78_03	LeftWideTurn CleanedGRS	Subject #78 (walking)
78_04	SuperTightLeft CleanedGRS	Subject #78 (walking)
78_05	SuperTightRight CleanedGRS	Subject #78 (walking)
78_06	RunningStraight CleanedGRS	Subject #78 (walking)
78_07	RunningWideRight CleanedGRS	Subject #78 (walking)
78_08	RunningWideLeft CleanedGRS	Subject #78 (walking)
78_09	RunningTigherLeft CleanedGRS	Subject #78 (walking)
78_10	RunningTighterRight CleanedGRS	Subject #78 (walking)
78_11	calibration	Subject #78 (walking)
78_12	RunningNoBall CleanedGRS	Subject #78 (walking)
78_13	OffensiveMoveSpinLeft CleanedGRS	Subject #78 (walking)
78_14	OffensiveMoveSpinLeft CleanedGRS	Subject #78 (walking)
78_15	OffensiveMoveGoRight CleanedGRS	Subject #78 (walking)
78_16	OffensiveMoveGoLeft CleanedGRs	Subject #78 (walking)
78_17	OffensiveMoveSpinRight CleanedGRS	Subject #78 (walking)
78_18	WalkEvasiveLeft CleanedGRS	Subject #78 (walking)
78_19	WalkEvasiveRight CleanedGRS	Subject #78 (walking)
78_20	FeintLeftMoveRight CleanedGRS	Subject #78 (walking)
78_21	FeintRightMoveLeft CleanedGRS	Subject #78 (walking)
78_22	FakeShotBreakRight CleanedGRs	Subject #78 (walking)
78_23	FakeShotBreakLeft CleanedGRS	Subject #78 (walking)
78_24	DefensiveStraightNoStop CleanedGRS	Subject #78 (walking)
78_25	DefensiveStraightWithStop CleanedGRS	Subject #78 (walking)
78_26	DefensiveRightStopToStop CleanedGRS	Subject #78 (walking)
78_27	DefensiveLeftStopToStop CleanedGRS	Subject #78 (walking)
78_28	DefensiveMoveZigZag CleanedGRS	Subject #78 (walking)
78_29	DefensiveMoveSideToSide CleanedGRS	Subject #78 (walking)
78_30	DefensiveMoveSideToSide CleanedGRS	Subject #78 (walking)
78_31	Pivoting CleanedGRS	Subject #78 (walking)
78_32	SraightDriveFromStop Cleaned GRS	Subject #78 (walking)
78_33	RightDrive (left then right) Cleaned GRS	Subject #78 (walking)
78_34	LeftDrive (right then left) Cleaned GRS	Subject #78 (walking)
78_35	RightTightTurn CleanedGRS	Subject #78 (walking)
79_01	chopping wood	Subject #79 (actor everyday activities)
79_02	swimming	Subject #79 (actor everyday activities)
79_03	swimming	Subject #79 (actor everyday activities)
79_04	digging	Subject #79 (actor everyday activities)
79_05	sewing	Subject #79 (actor everyday activities)
79_06	hand shake	Subject #79 (actor everyday activities)
79_07	lost marker	Subject #79 (actor everyday activities)
79_08	boxing	Subject #79 (actor everyday activities)
79_09	slicing bread	Subject #79 (actor everyday activities)
79_10	chopping onions	Subject #79 (actor everyday activities)
79_11	Subject calibration	Subject #79 (actor everyday activities)
79_12	eating dinner	Subject #79 (actor everyday activities)
79_13	mixing batter	Subject #79 (actor everyday activities)
79_14	making dough	Subject #79 (actor everyday activities)
79_15	eating a sandwich	Subject #79 (actor everyday activities)
79_16	buying something	Subject #79 (actor everyday activities)
79_17	playing violin	Subject #79 (actor everyday activities)
79_18	playing drums	Subject #79 (actor everyday activities)
79_19	playing piano	Subject #79 (actor everyday activities)
79_20	hanging a picture	Subject #79 (actor everyday activities)
79_21	putting on a pull over	Subject #79 (actor everyday activities)
79_22	range of motion	Subject #79 (actor everyday activities)
79_23	putting on a jacket	Subject #79 (actor everyday activities)
79_24	putting on button up sweater	Subject #79 (actor everyday activities)
79_25	moving heavy box	Subject #79 (actor everyday activities)
79_26	planting a tree	Subject #79 (actor everyday activities)
79_27	planting a plant	Subject #79 (actor everyday activities)
79_28	putting on a ball cap	Subject #79 (actor everyday activities)
79_29	putting on a dress	Subject #79 (actor everyday activities)
79_30	pushing a swing	Subject #79 (actor everyday activities)
79_31	writing on a chalkboard	Subject #79 (actor everyday activities)
79_32	writing on a chalkboard	Subject #79 (actor everyday activities)
79_33	chug a beer	Subject #79 (actor everyday activities)
79_34	fishing	Subject #79 (actor everyday activities)
79_35	fishing	Subject #79 (actor everyday activities)
79_36	answering the phone	Subject #79 (actor everyday activities)
79_37	dialing phone	Subject #79 (actor everyday activities)
79_38	drinking water	Subject #79 (actor everyday activities)
79_39	sipping martinee	Subject #79 (actor everyday activities)
79_40	drinking a soda	Subject #79 (actor everyday activities)
79_41	sipping coffee	Subject #79 (actor everyday activities)
79_42	eating soup	Subject #79 (actor everyday activities)
79_43	painting	Subject #79 (actor everyday activities)
79_44	washing a window	Subject #79 (actor everyday activities)
79_45	bear	Subject #79 (actor everyday activities)
79_46	bear	Subject #79 (actor everyday activities)
79_47	chicken	Subject #79 (actor everyday activities)
79_48	elephant	Subject #79 (actor everyday activities)
79_49	monkey	Subject #79 (actor everyday activities)
79_50	mouse	Subject #79 (actor everyday activities)
79_51	chipmunk	Subject #79 (actor everyday activities)
79_52	prairie dog	Subject #79 (actor everyday activities)
79_53	dog	Subject #79 (actor everyday activities)
79_54	snake	Subject #79 (actor everyday activities)
79_55	sweeping	Subject #79 (actor everyday activities)
79_56	T-rex	Subject #79 (actor everyday activities)
79_57	fish	Subject #79 (actor everyday activities)
79_58	bird	Subject #79 (actor everyday activities)
79_59	cat	Subject #79 (actor everyday activities)
79_60	chicken	Subject #79 (actor everyday activities)
79_61	cow	Subject #79 (actor everyday activities)
79_62	chicken	Subject #79 (actor everyday activities)
79_63	tiger	Subject #79 (actor everyday activities)
79_64	penguin	Subject #79 (actor everyday activities)
79_65	horse	Subject #79 (actor everyday activities)
79_66	movie and trial dont match	Subject #79 (actor everyday activities)
79_67	no movie	Subject #79 (actor everyday activities)
79_68	cold	Subject #79 (actor everyday activities)
79_69	very happy	Subject #79 (actor everyday activities)
79_70	laughing	Subject #79 (actor everyday activities)
79_71	sad	Subject #79 (actor everyday activities)
79_72	crying	Subject #79 (actor everyday activities)
79_73	scared	Subject #79 (actor everyday activities)
79_74	upset	Subject #79 (actor everyday activities)
79_75	channel surfing	Subject #79 (actor everyday activities)
79_76	driving	Subject #79 (actor everyday activities)
79_77	vacuuming	Subject #79 (actor everyday activities)
79_78	taking a movie	Subject #79 (actor everyday activities)
79_79	putting on headphones	Subject #79 (actor everyday activities)
79_80	using a palm pilot	Subject #79 (actor everyday activities)
79_81	brushing teeth	Subject #79 (actor everyday activities)
79_82	putting on deoderant	Subject #79 (actor everyday activities)
79_83	shaving	Subject #79 (actor everyday activities)
79_84	combing hair	Subject #79 (actor everyday activities)
79_85	typing on a laptop	Subject #79 (actor everyday activities)
79_86	shooting bow and arrow	Subject #79 (actor everyday activities)
79_87	raking	Subject #79 (actor everyday activities)
79_88	swatting at a fly	Subject #79 (actor everyday activities)
79_89	holding a baby	Subject #79 (actor everyday activities)
79_90	washing	Subject #79 (actor everyday activities)
79_91	football	Subject #79 (actor everyday activities)
79_92	frisbee	Subject #79 (actor everyday activities)
79_93	weight lifting	Subject #79 (actor everyday activities)
79_94	flexing	Subject #79 (actor everyday activities)
79_95	rowing	Subject #79 (actor everyday activities)
79_96	shooting a gun	Subject #79 (actor everyday activities)
80_01	shaking hands	Subject #80 (assorted motions)
80_02	chopping onions	Subject #80 (assorted motions)
80_03	shooting a gun	Subject #80 (assorted motions)
80_04	sewing	Subject #80 (assorted motions)
80_05	digging a hole	Subject #80 (assorted motions)
80_06	paying for something	Subject #80 (assorted motions)
80_07	hanging picture	Subject #80 (assorted motions)
80_08	picking up something	Subject #80 (assorted motions)
80_09	planting a flower	Subject #80 (assorted motions)
80_10	boxing	Subject #80 (assorted motions)
80_11	putting on a sweater	Subject #80 (assorted motions)
80_12	fishing	Subject #80 (assorted motions)
80_13	drumming	Subject #80 (assorted motions)
80_14	teaching	Subject #80 (assorted motions)
80_15	putting on a coat	Subject #80 (assorted motions)
80_16	mixing batter	Subject #80 (assorted motions)
80_17	hand mixing dough	Subject #80 (assorted motions)
80_18	vacuuming	Subject #80 (assorted motions)
80_19	pushing broom	Subject #80 (assorted motions)
80_20	planting	Subject #80 (assorted motions)
80_21	pushing swing	Subject #80 (assorted motions)
80_22	putting on a hat	Subject #80 (assorted motions)
80_23	putting on a skirt	Subject #80 (assorted motions)
80_24	eating	Subject #80 (assorted motions)
80_25	answering a phone	Subject #80 (assorted motions)
80_26	dialing phone	Subject #80 (assorted motions)
80_27	setting glass of water	Subject #80 (assorted motions)
80_28	drinking and smoking	Subject #80 (assorted motions)
80_29	chugging	Subject #80 (assorted motions)
80_30	range of motion	Subject #80 (assorted motions)
80_31	making coffee	Subject #80 (assorted motions)
80_32	slicing	Subject #80 (assorted motions)
80_33	eating soup	Subject #80 (assorted motions)
80_34	rake leaves	Subject #80 (assorted motions)
80_35	putting on headphones	Subject #80 (assorted motions)
80_36	violin	Subject #80 (assorted motions)
80_37	TV	Subject #80 (assorted motions)
80_38	driving	Subject #80 (assorted motions)
80_39	Unknown	Subject #80 (assorted motions)
80_40	drinking from bottle	Subject #80 (assorted motions)
80_41	freezing	Subject #80 (assorted motions)
80_42	freezing	Subject #80 (assorted motions)
80_43	happy	Subject #80 (assorted motions)
80_44	laughing	Subject #80 (assorted motions)
80_45	crying	Subject #80 (assorted motions)
80_46	crying	Subject #80 (assorted motions)
80_47	Unknown	Subject #80 (assorted motions)
80_48	arguing	Subject #80 (assorted motions)
80_49	gorilla	Subject #80 (assorted motions)
80_50	cleaning window	Subject #80 (assorted motions)
80_51	chicken	Subject #80 (assorted motions)
80_52	dog	Subject #80 (assorted motions)
80_53	elephant	Subject #80 (assorted motions)
80_54	monkey	Subject #80 (assorted motions)
80_55	mouse	Subject #80 (assorted motions)
80_56	chip monk	Subject #80 (assorted motions)
80_57	prairie dog	Subject #80 (assorted motions)
80_58	snake	Subject #80 (assorted motions)
80_59	panther	Subject #80 (assorted motions)
80_60	Unknown	Subject #80 (assorted motions)
80_61	sweeping	Subject #80 (assorted motions)
80_62	bird	Subject #80 (assorted motions)
80_63	chicken	Subject #80 (assorted motions)
80_64	cat	Subject #80 (assorted motions)
80_65	fish	Subject #80 (assorted motions)
80_66	Unknown	Subject #80 (assorted motions)
80_67	Unknown	Subject #80 (assorted motions)
80_68	Unknown	Subject #80 (assorted motions)
80_69	painting	Subject #80 (assorted motions)
80_70	piano	Subject #80 (assorted motions)
80_71	chopping wood	Subject #80 (assorted motions)
80_72	swimming	Subject #80 (assorted motions)
80_73	shaking hands	Subject #80 (assorted motions)
81_01	fix hair and walk forward	Subject #81 (pushing a box; jumping off a ledge; walks)
81_02	walk forward	Subject #81 (pushing a box; jumping off a ledge; walks)
81_03	walk	Subject #81 (pushing a box; jumping off a ledge; walks)
81_04	walk at a brisk pace	Subject #81 (pushing a box; jumping off a ledge; walks)
81_05	push heavy object	Subject #81 (pushing a box; jumping off a ledge; walks)
81_06	push heavy box	Subject #81 (pushing a box; jumping off a ledge; walks)
81_07	pull heavy object	Subject #81 (pushing a box; jumping off a ledge; walks)
81_08	drag heavy object	Subject #81 (pushing a box; jumping off a ledge; walks)
81_09	drag heavy object	Subject #81 (pushing a box; jumping off a ledge; walks)
81_10	push object that is high in air	Subject #81 (pushing a box; jumping off a ledge; walks)
81_11	push object that is high in air	Subject #81 (pushing a box; jumping off a ledge; walks)
81_12	jump backwards off ledge	Subject #81 (pushing a box; jumping off a ledge; walks)
81_13	jump backwards off ledge	Subject #81 (pushing a box; jumping off a ledge; walks)
81_14	climb backwards off ledge	Subject #81 (pushing a box; jumping off a ledge; walks)
81_15	climb backwards off ledge	Subject #81 (pushing a box; jumping off a ledge; walks)
81_16	Unknown	Subject #81 (pushing a box; jumping off a ledge; walks)
81_17	walk forward	Subject #81 (pushing a box; jumping off a ledge; walks)
81_18	adjust hair walk forward	Subject #81 (pushing a box; jumping off a ledge; walks)
82_01	Static pose	Subject #82 (jumping; pushing; emotional walks)
82_02	Jump off ledge	Subject #82 (jumping; pushing; emotional walks)
82_03	Jump off ledge	Subject #82 (jumping; pushing; emotional walks)
82_04	Jump off ledge	Subject #82 (jumping; pushing; emotional walks)
82_05	sitting on ground relaxing	Subject #82 (jumping; pushing; emotional walks)
82_06	Pushing on heavy object	Subject #82 (jumping; pushing; emotional walks)
82_07	Pushing on heavy object	Subject #82 (jumping; pushing; emotional walks)
82_08	stand still; casual walk forward	Subject #82 (jumping; pushing; emotional walks)
82_09	confident walk forward	Subject #82 (jumping; pushing; emotional walks)
82_10	sad walk forward	Subject #82 (jumping; pushing; emotional walks)
82_11	normal walk forward	Subject #82 (jumping; pushing; emotional walks)
82_12	happy or fast walk forward	Subject #82 (jumping; pushing; emotional walks)
82_13	normal walk forward	Subject #82 (jumping; pushing; emotional walks)
82_14	walk forward and slow down	Subject #82 (jumping; pushing; emotional walks)
82_15	walk forward and turn sideways	Subject #82 (jumping; pushing; emotional walks)
82_16	bang on high object	Subject #82 (jumping; pushing; emotional walks)
82_17	bang on high object	Subject #82 (jumping; pushing; emotional walks)
82_18	static pose	Subject #82 (jumping; pushing; emotional walks)
83_01	large sidestep to right	Subject #83 (steps)
83_02	sidestep to the right and up a ledge	Subject #83 (steps)
83_03	large step to a short ledge	Subject #83 (steps)
83_04	large sidestep to right	Subject #83 (steps)
83_05	very large sidestep to right	Subject #83 (steps)
83_06	very large sidestep to right and down	Subject #83 (steps)
83_07	short sidestep to right and down	Subject #83 (steps)
83_08	medium step forward and down	Subject #83 (steps)
83_09	short step forward and down	Subject #83 (steps)
83_10	medium step forward and down	Subject #83 (steps)
83_11	static pose	Subject #83 (steps)
83_12	medium sidestep to right and down	Subject #83 (steps)
83_13	large sidestep to right	Subject #83 (steps)
83_14	short sidestep to left and down	Subject #83 (steps)
83_15	short step forward	Subject #83 (steps)
83_16	medium sidestep to left and down	Subject #83 (steps)
83_17	medium step to left and down	Subject #83 (steps)
83_18	short step to left and forward	Subject #83 (steps)
83_19	medium sidestep to left	Subject #83 (steps)
83_20	medium step forward	Subject #83 (steps)
83_21	large step to left and forward	Subject #83 (steps)
83_22	stretching	Subject #83 (steps)
83_23	short sidestep to left and up	Subject #83 (steps)
83_24	medium step to left and up	Subject #83 (steps)
83_25	short step forward and up	Subject #83 (steps)
83_26	medium step to left, forward, and up	Subject #83 (steps)
83_27	walk forward stepping up stairs	Subject #83 (steps)
83_28	walk forward stepping up stairs	Subject #83 (steps)
83_29	walk forward stepping up stairs	Subject #83 (steps)
83_30	walk forward stepping up stairs	Subject #83 (steps)
83_31	walk forward stepping up stairs	Subject #83 (steps)
83_32	walk forward stepping up stairs	Subject #83 (steps)
83_33	sidestep to right then back to left	Subject #83 (steps)
83_34	walk forward and up stairs	Subject #83 (steps)
83_35	walk forward and stepping up stairs	Subject #83 (steps)
83_36	walk forward turn 90 degrees left walk forward	Subject #83 (steps)
83_37	walk forward turn 90 degrees right walk forward	Subject #83 (steps)
83_38	walk forward turn 90 degrees left walk forward	Subject #83 (steps)
83_39	walk forward turn 90 degrees right walk forward	Subject #83 (steps)
83_40	hop forward	Subject #83 (steps)
83_41	hop forward	Subject #83 (steps)
83_42	long jump forward	Subject #83 (steps)
83_43	long jump forward	Subject #83 (steps)
83_44	medium step forward	Subject #83 (steps)
83_45	hop forward	Subject #83 (steps)
83_46	medium hop forward	Subject #83 (steps)
83_47	long jump forward	Subject #83 (steps)
83_48	short hop forward	Subject #83 (steps)
83_49	medium hop forward	Subject #83 (steps)
83_50	long jump forward	Subject #83 (steps)
83_51	hop turn 90 degrees left in air	Subject #83 (steps)
83_52	hop turn 90 degrees left in air	Subject #83 (steps)
83_53	hop turn 90 degrees left in air	Subject #83 (steps)
83_54	hop turn 180 degrees left in air	Subject #83 (steps)
83_55	medium sidestep to right	Subject #83 (steps)
83_56	hop turn left 180 degrees in air	Subject #83 (steps)
83_57	hop turn left 180 degrees in air	Subject #83 (steps)
83_58	hop turn left 270 degrees in air	Subject #83 (steps)
83_59	hop turn left 270 degrees in air	Subject #83 (steps)
83_60	hop turn left 270 degrees in air	Subject #83 (steps)
83_61	hop turn 360 degrees left in air	Subject #83 (steps)
83_62	hop turn left 360 degrees in air	Subject #83 (steps)
83_63	large sidestep to right and forward	Subject #83 (steps)
83_64	hop and turn right 360 degrees in air	Subject #83 (steps)
83_65	hop and turn right 360 degrees in air	Subject #83 (steps)
83_66	short sidestep to right	Subject #83 (steps)
83_67	short sidestep to the right	Subject #83 (steps)
83_68	medium sidestep to right	Subject #83 (steps)
85_01	JumpTwist	Subject #85 (jumps; flips; breakdance)
85_02	JumpTwist	Subject #85 (jumps; flips; breakdance)
85_03	UpRightSequence	Subject #85 (jumps; flips; breakdance)
85_04	FancyFootWork	Subject #85 (jumps; flips; breakdance)
85_05	HandStandKicks	Subject #85 (jumps; flips; breakdance)
85_06	KickFlip	Subject #85 (jumps; flips; breakdance)
85_07	KickFlipStumble	Subject #85 (jumps; flips; breakdance)
85_08	Helicopter	Subject #85 (jumps; flips; breakdance)
85_09	motorcycle pose	Subject #85 (jumps; flips; breakdance)
85_10	EndofBreakDance	Subject #85 (jumps; flips; breakdance)
85_11	UpRightSequence	Subject #85 (jumps; flips; breakdance)
85_12	LongSequenceGood	Subject #85 (jumps; flips; breakdance)
85_13	BadStartSequnce	Subject #85 (jumps; flips; breakdance)
85_14	BreakSequencewithFlips	Subject #85 (jumps; flips; breakdance)
85_15	90TwistsFall	Subject #85 (jumps; flips; breakdance)
86_01	jumps kicks and punches	Subject #86 (sports and various activities)
86_02	walk, squats, run, stretch, jumps, punches, and drinking	Subject #86 (sports and various activities)
86_03	walking, running, jumping, kicking, and stretching	Subject #86 (sports and various activities)
86_04	walking, stretching, punching, chopping, and drinking	Subject #86 (sports and various activities)
86_05	walking, jumping, jumping jacks, jumping on one foot, punching, chopping,	Subject #86 (sports and various activities)
86_06	walking, running, kicking, punching, knee kicking, and stretching	Subject #86 (sports and various activities)
86_07	walking, swinging arms, stretching, jumping on one leg, and jumping	Subject #86 (sports and various activities)
86_08	walking, squats, stretching, kicking, and punching	Subject #86 (sports and various activities)
86_09	walking, sitting, looking, stand up	Subject #86 (sports and various activities)
86_10	walk around, sit, stand up, and running	Subject #86 (sports and various activities)
86_11	walking, stretching, walking and turning	Subject #86 (sports and various activities)
86_12	walking, dragging, sweeping, dustpan, wipe window, and wipe mirror	Subject #86 (sports and various activities)
86_13	walking around, walk up ladder, step down ladder	Subject #86 (sports and various activities)
86_14	bouncing basketball, shooting basketball, dribble basketball, two handed dribble	Subject #86 (sports and various activities)
86_15	walking, sitting, hand motions	Subject #86 (sports and various activities)
87_01	Jump with kick and spin	Subject #87 (acrobatics)
87_02	T-Pose	Subject #87 (acrobatics)
87_03	Backflip	Subject #87 (acrobatics)
87_04	backflip	Subject #87 (acrobatics)
87_05	cartwheels	Subject #87 (acrobatics)
88_01	backflip	Subject #88 (acrobatics)
88_02	backflips, jump onto platform, handstands, vertical pushups	Subject #88 (acrobatics)
88_03	motorcycle pose	Subject #88 (acrobatics)
88_04	stretches, cartwheels, flips, spin kicks, spins, and fall	Subject #88 (acrobatics)
88_05	cartwheel into backflip	Subject #88 (acrobatics)
88_06	jump and spin kick	Subject #88 (acrobatics)
88_07	cartwheel	Subject #88 (acrobatics)
88_08	crouch and flip backward on hands	Subject #88 (acrobatics)
88_09	stretch and cartwheel	Subject #88 (acrobatics)
88_10	stretch and spin	Subject #88 (acrobatics)
88_11	stretches and jumps	Subject #88 (acrobatics)
89_01	balance object on forehead	Subject #89 (acrobatics)
89_02	motorcycle pose	Subject #89 (acrobatics)
89_03	flip and stand on one hand	Subject #89 (acrobatics)
89_04	spins, flips, stand on one hand	Subject #89 (acrobatics)
89_05	spin upside down, handstand, flips	Subject #89 (acrobatics)
89_06	balance beam	Subject #89 (acrobatics)
90_01	bkwd summersult	Subject #90 (cartwheels; acrobatics; dances)
90_02	cartwheel	Subject #90 (cartwheels; acrobatics; dances)
90_03	cartwheel	Subject #90 (cartwheels; acrobatics; dances)
90_04	cartwheel	Subject #90 (cartwheels; acrobatics; dances)
90_05	jump kick	Subject #90 (cartwheels; acrobatics; dances)
90_06	jump kick	Subject #90 (cartwheels; acrobatics; dances)
90_07	jump kick	Subject #90 (cartwheels; acrobatics; dances)
90_08	side flip	Subject #90 (cartwheels; acrobatics; dances)
90_09	Flip forward onto hands and back again	Subject #90 (cartwheels; acrobatics; dances)
90_10	90_10.amc	Subject #90 (cartwheels; acrobatics; dances)
90_11	hand spring	Subject #90 (cartwheels; acrobatics; dances)
90_12	bck flp twst fall	Subject #90 (cartwheels; acrobatics; dances)
90_13	bck flp twst fall	Subject #90 (cartwheels; acrobatics; dances)
90_14	front hand flip	Subject #90 (cartwheels; acrobatics; dances)
90_15	front hand flip	Subject #90 (cartwheels; acrobatics; dances)
90_16	fall on face	Subject #90 (cartwheels; acrobatics; dances)
90_17	BannanaPeelSlip	Subject #90 (cartwheels; acrobatics; dances)
90_18	RugPullFall	Subject #90 (cartwheels; acrobatics; dances)
90_19	monkey backflip	Subject #90 (cartwheels; acrobatics; dances)
90_20	monkey sequence	Subject #90 (cartwheels; acrobatics; dances)
90_21	monkey sequence	Subject #90 (cartwheels; acrobatics; dances)
90_22	straight walk	Subject #90 (cartwheels; acrobatics; dances)
90_23	straight walk	Subject #90 (cartwheels; acrobatics; dances)
90_24	ball mount	Subject #90 (cartwheels; acrobatics; dances)
90_25	fwd ball walk	Subject #90 (cartwheels; acrobatics; dances)
90_26	fwd ball walk	Subject #90 (cartwheels; acrobatics; dances)
90_27	bwk ball walk	Subject #90 (cartwheels; acrobatics; dances)
90_28	breakdance	Subject #90 (cartwheels; acrobatics; dances)
90_29	sequesnce	Subject #90 (cartwheels; acrobatics; dances)
90_30	russian dance	Subject #90 (cartwheels; acrobatics; dances)
90_31	russian dance	Subject #90 (cartwheels; acrobatics; dances)
90_32	moonwalk	Subject #90 (cartwheels; acrobatics; dances)
90_33	arm up wide leg roll	Subject #90 (cartwheels; acrobatics; dances)
90_34	wide leg roll	Subject #90 (cartwheels; acrobatics; dances)
90_35	wide leg roll	Subject #90 (cartwheels; acrobatics; dances)
90_36	wide leg roll	Subject #90 (cartwheels; acrobatics; dances)
91_01	Walk digital figure eight	Subject #91 (walks and turns)
91_02	WalkStraight	Subject #91 (walks and turns)
91_03	Walk figure eight	Subject #91 (walks and turns)
91_04	Walking	Subject #91 (walks and turns)
91_05	Mummy Walk	Subject #91 (walks and turns)
91_06	Motorcycle Pose	Subject #91 (walks and turns)
91_07	mummy8	Subject #91 (walks and turns)
91_08	mummyDigital8	Subject #91 (walks and turns)
91_09	DrunkWalk	Subject #91 (walks and turns)
91_10	SlowWalk	Subject #91 (walks and turns)
91_11	LavishWalk	Subject #91 (walks and turns)
91_12	TooCoolWalk	Subject #91 (walks and turns)
91_13	SadWalk	Subject #91 (walks and turns)
91_14	DepressedWalk	Subject #91 (walks and turns)
91_15	ClumsyWalk	Subject #91 (walks and turns)
91_16	Limp	Subject #91 (walks and turns)
91_17	QuickWalk	Subject #91 (walks and turns)
91_18	CarefulWalk LookingAround	Subject #91 (walks and turns)
91_19	March	Subject #91 (walks and turns)
91_20	ShyWalk	Subject #91 (walks and turns)
91_21	acheyWalk	Subject #91 (walks and turns)
91_22	CasualQuickWalk	Subject #91 (walks and turns)
91_23	CoolWalk	Subject #91 (walks and turns)
91_24	HurtLegWalk	Subject #91 (walks and turns)
91_25	DragBadLegWalk	Subject #91 (walks and turns)
91_26	HurtStomachWalk	Subject #91 (walks and turns)
91_27	SlowWalk	Subject #91 (walks and turns)
91_28	GhettoWalk	Subject #91 (walks and turns)
91_29	NormalWalk	Subject #91 (walks and turns)
91_30	SexyWalk	Subject #91 (walks and turns)
91_31	NormalWalk	Subject #91 (walks and turns)
91_32	ScaredWalk	Subject #91 (walks and turns)
91_33	MachoWalk	Subject #91 (walks and turns)
91_34	NormalWalk	Subject #91 (walks and turns)
91_35	TrafficWalk	Subject #91 (walks and turns)
91_36	WalkStraight	Subject #91 (walks and turns)
91_37	Forward	Subject #91 (walks and turns)
91_38	SmallForward	Subject #91 (walks and turns)
91_39	JumpForward	Subject #91 (walks and turns)
91_40	JumpForward	Subject #91 (walks and turns)
91_41	JumpForward	Subject #91 (walks and turns)
91_42	JumpForward	Subject #91 (walks and turns)
91_43	JumpSmallForward	Subject #91 (walks and turns)
91_44	JumpSmallForward	Subject #91 (walks and turns)
91_45	JumpForward	Subject #91 (walks and turns)
91_46	Jump Turn	Subject #91 (walks and turns)
91_47	Jump Turn	Subject #91 (walks and turns)
91_48	JumpTurn	Subject #91 (walks and turns)
91_49	Jump Turn	Subject #91 (walks and turns)
91_50	JumpTurn	Subject #91 (walks and turns)
91_51	FurtherJumpTurn	Subject #91 (walks and turns)
91_52	SmallJumpTurn	Subject #91 (walks and turns)
91_53	180 degree jump	Subject #91 (walks and turns)
91_54	180	Subject #91 (walks and turns)
91_55	180	Subject #91 (walks and turns)
91_56	90	Subject #91 (walks and turns)
91_57	WalkForward	Subject #91 (walks and turns)
91_58	270	Subject #91 (walks and turns)
91_59	360 smallStumble	Subject #91 (walks and turns)
91_60	360	Subject #91 (walks and turns)
91_61	360	Subject #91 (walks and turns)
91_62	walkFigure8	Subject #91 (walks and turns)
93_01	Motorcycle Pose	Subject #93 (Charleston Dance)
93_02	rangeOfMotion	Subject #93 (Charleston Dance)
93_03	charleston_01	Subject #93 (Charleston Dance)
93_04	charleston_side_by_side_female	Subject #93 (Charleston Dance)
93_05	charleston_side_by_side_male	Subject #93 (Charleston Dance)
93_06	lindyHop2	Subject #93 (Charleston Dance)
93_07	Casual Walk	Subject #93 (Charleston Dance)
93_08	xtra fancY charleston	Subject #93 (Charleston Dance)
94_01	Unknown	Subject #94 (indian dance)
94_02	Unknown	Subject #94 (indian dance)
94_03	Unknown	Subject #94 (indian dance)
94_04	Unknown	Subject #94 (indian dance)
94_05	Unknown	Subject #94 (indian dance)
94_06	Unknown	Subject #94 (indian dance)
94_07	Unknown	Subject #94 (indian dance)
94_08	Unknown	Subject #94 (indian dance)
94_09	Unknown	Subject #94 (indian dance)
94_10	Unknown	Subject #94 (indian dance)
94_11	Unknown	Subject #94 (indian dance)
94_12	Unknown	Subject #94 (indian dance)
94_13	Unknown	Subject #94 (indian dance)
94_14	Unknown	Subject #94 (indian dance)
94_15	Unknown	Subject #94 (indian dance)
94_16	Unknown	Subject #94 (indian dance)
102_01	RightWideTurn	Subject #102 (Basketball)
102_02	LeftWideTurn	Subject #102 (Basketball)
102_03	SuperTightLeft	Subject #102 (Basketball)
102_04	SuperTightRight	Subject #102 (Basketball)
102_05	RunningStraight	Subject #102 (Basketball)
102_06	RunningWideRight	Subject #102 (Basketball)
102_07	RunningWideLeft	Subject #102 (Basketball)
102_08	RunningTighterRight	Subject #102 (Basketball)
102_09	calibration	Subject #102 (Basketball)
102_10	RunningNoBall	Subject #102 (Basketball)
102_11	OffensiveMoveSpinLeft	Subject #102 (Basketball)
102_12	OffensiveMoveSpinLeft	Subject #102 (Basketball)
102_13	OffensiveMoveGoRight	Subject #102 (Basketball)
102_14	OffensiveMoveGoLeft	Subject #102 (Basketball)
102_15	OffensiveMoveSpinRight	Subject #102 (Basketball)
102_16	WalkEvasiveLeft	Subject #102 (Basketball)
102_17	WalkEvasiveRight	Subject #102 (Basketball)
102_18	FeintLeftMoveRight	Subject #102 (Basketball)
102_19	FeintRightMoveLeft	Subject #102 (Basketball)
102_20	FakeShotBreakRight	Subject #102 (Basketball)
102_21	FakeShotBreakLeft	Subject #102 (Basketball)
102_22	DefensiveStraightNoStop	Subject #102 (Basketball)
102_23	DefensiveStraightWithStop	Subject #102 (Basketball)
102_24	DefensiveRightStopToStop	Subject #102 (Basketball)
102_25	DefensiveLeftStopToStop	Subject #102 (Basketball)
102_26	DefensiveMoveZigZag	Subject #102 (Basketball)
102_27	DefensiveMoveSideToSide	Subject #102 (Basketball)
102_28	DefensiveMoveSideToSide	Subject #102 (Basketball)
102_29	Pivoting	Subject #102 (Basketball)
102_30	SraightDriveFromStop	Subject #102 (Basketball)
102_31	RightDrive (left then right)	Subject #102 (Basketball)
102_32	LeftDrive (right then left)	Subject #102 (Basketball)
102_33	RightTightTurn	Subject #102 (Basketball)
103_01	Unknown	Subject #103 (Charelston Dancing)
103_02	rangeOfMotion_01	Subject #103 (Charelston Dancing)
103_03	charleston_01	Subject #103 (Charelston Dancing)
103_04	charleston_side_by_side_female	Subject #103 (Charelston Dancing)
103_05	charleston_side_by_side_male	Subject #103 (Charelston Dancing)
103_06	lindyHop2	Subject #103 (Charelston Dancing)
103_07	Casual Walk	Subject #103 (Charelston Dancing)
103_08	xtra fancY charleston	Subject #103 (Charelston Dancing)
104_01	JogThrough	Subject #104 (motion)
104_02	neutral Male walk, exact footfalls	Subject #104 (motion)
104_03	Frankenstein male walk, exact footfalls	Subject #104 (motion)
104_04	JogThrough	Subject #104 (motion)
104_05	Unknown	Subject #104 (motion)
104_06	StartJog	Subject #104 (motion)
104_07	Unknown	Subject #104 (motion)
104_08	StartJog	Subject #104 (motion)
104_09	JogStop	Subject #104 (motion)
104_10	JogStop	Subject #104 (motion)
104_11	HappyGoLuckWalk	Subject #104 (motion)
104_12	ExcitedWalk	Subject #104 (motion)
104_13	StumbleWalk	Subject #104 (motion)
104_14	HappyStartWalk	Subject #104 (motion)
104_15	Unknown	Subject #104 (motion)
104_16	SpasticWalk	Subject #104 (motion)
104_17	SpasticStop	Subject #104 (motion)
104_18	SpasticStop	Subject #104 (motion)
104_19	CasualWalk	Subject #104 (motion)
104_20	Unknown	Subject #104 (motion)
104_21	Unknown	Subject #104 (motion)
104_22	RegularWalk8	Subject #104 (motion)
104_23	Unknown	Subject #104 (motion)
104_24	Unknown	Subject #104 (motion)
104_25	Unknown	Subject #104 (motion)
104_26	Unknown	Subject #104 (motion)
104_27	RegularWalkRightAngleTurns	Subject #104 (motion)
104_28	SternWalk	Subject #104 (motion)
104_29	SternWalk	Subject #104 (motion)
104_30	SternWalk8	Subject #104 (motion)
104_31	Unknown	Subject #104 (motion)
104_32	SternWalkRightAngleTurns	Subject #104 (motion)
104_33	Unknown	Subject #104 (motion)
104_34	Unknown	Subject #104 (motion)
104_35	SlowWalk	Subject #104 (motion)
104_36	SlowWalk8	Subject #104 (motion)
104_37	RunThrough	Subject #104 (motion)
104_38	Unknown	Subject #104 (motion)
104_39	SlowWalkRightAngleTurns	Subject #104 (motion)
104_40	Unknown	Subject #104 (motion)
104_41	ZombieWalk	Subject #104 (motion)
104_42	ZombieWalk8	Subject #104 (motion)
104_43	ZombieWalkRightAngleTurns	Subject #104 (motion)
104_44	AttitudeWalk	Subject #104 (motion)
104_45	AttitudeWalk8	Subject #104 (motion)
104_46	AttitudeWalkRightAngleTurns	Subject #104 (motion)
104_47	Unknown	Subject #104 (motion)
104_48	RunThrough	Subject #104 (motion)
104_49	Unknown	Subject #104 (motion)
104_50	Unknown	Subject #104 (motion)
104_51	Unknown	Subject #104 (motion)
104_52	Unknown	Subject #104 (motion)
104_53	StartRun	Subject #104 (motion)
104_54	StartRun	Subject #104 (motion)
104_55	StartRun	Subject #104 (motion)
104_56	RunStop	Subject #104 (motion)
104_57	RunStop	Subject #104 (motion)
105_01	WalkDigital8	Subject #105 (motion)
105_02	WalkStraight	Subject #105 (motion)
105_03	Walk8	Subject #105 (motion)
105_04	Digital8	Subject #105 (motion)
105_05	mummyWalk	Subject #105 (motion)
105_06	MotorCyclePose	Subject #105 (motion)
105_07	mummy8	Subject #105 (motion)
105_08	mummyDigital8	Subject #105 (motion)
105_09	DrunkWalk	Subject #105 (motion)
105_10	SlowWalk	Subject #105 (motion)
105_11	LavishWalk	Subject #105 (motion)
105_12	TooCoolWalk	Subject #105 (motion)
105_13	SadWalk	Subject #105 (motion)
105_14	DepressedWalk	Subject #105 (motion)
105_15	ClumsyWalk	Subject #105 (motion)
105_16	Limp	Subject #105 (motion)
105_17	QuickWalk	Subject #105 (motion)
105_18	CarefulWalk LookingAround	Subject #105 (motion)
105_19	March	Subject #105 (motion)
105_20	ShyWalk	Subject #105 (motion)
105_21	acheyWalk	Subject #105 (motion)
105_22	CasualQuickWalk	Subject #105 (motion)
105_23	CoolWalk	Subject #105 (motion)
105_24	HurtLegWalk	Subject #105 (motion)
105_25	DragBadLegWalk	Subject #105 (motion)
105_26	HurtStomachWalk	Subject #105 (motion)
105_27	SlowWalk	Subject #105 (motion)
105_28	GhettoWalk	Subject #105 (motion)
105_29	NormalWalk	Subject #105 (motion)
105_30	SexyWalk	Subject #105 (motion)
105_31	NormalWalk	Subject #105 (motion)
105_32	ScaredWalk	Subject #105 (motion)
105_33	MachoWalk	Subject #105 (motion)
105_34	NormalWalk	Subject #105 (motion)
105_35	TrafficWalk	Subject #105 (motion)
105_36	WalkStraight	Subject #105 (motion)
105_37	Forward	Subject #105 (motion)
105_38	SmallForward	Subject #105 (motion)
105_39	JumpForward	Subject #105 (motion)
105_40	JumpForward	Subject #105 (motion)
105_41	JumpForward	Subject #105 (motion)
105_42	JumpForward	Subject #105 (motion)
105_43	JumpSmallForward	Subject #105 (motion)
105_44	JumpSmallForward	Subject #105 (motion)
105_45	JumpForward	Subject #105 (motion)
105_46	Jump Turn	Subject #105 (motion)
105_47	Jump Turn	Subject #105 (motion)
105_48	JumpTurn	Subject #105 (motion)
105_49	Jump Turn	Subject #105 (motion)
105_50	JumpTurn	Subject #105 (motion)
105_51	FurtherJumpTurn	Subject #105 (motion)
105_52	SmallJumpTurn	Subject #105 (motion)
105_53	180	Subject #105 (motion)
105_54	180	Subject #105 (motion)
105_55	180	Subject #105 (motion)
105_56	90	Subject #105 (motion)
105_57	WalkForward	Subject #105 (motion)
105_58	270	Subject #105 (motion)
105_59	360 smallStumble	Subject #105 (motion)
105_60	360	Subject #105 (motion)
105_61	360	Subject #105 (motion)
105_62	walkFigure8	Subject #105 (motion)
106_01	clean	Subject #106 (Female General Subject)
106_02	clean	Subject #106 (Female General Subject)
106_03	clean	Subject #106 (Female General Subject)
106_04	clean	Subject #106 (Female General Subject)
106_05	clean	Subject #106 (Female General Subject)
106_06	clean	Subject #106 (Female General Subject)
106_07	clean	Subject #106 (Female General Subject)
106_08	clean	Subject #106 (Female General Subject)
106_09	clean	Subject #106 (Female General Subject)
106_10	clean	Subject #106 (Female General Subject)
106_11	clean	Subject #106 (Female General Subject)
106_12	clean	Subject #106 (Female General Subject)
106_13	clean	Subject #106 (Female General Subject)
106_14	clean	Subject #106 (Female General Subject)
106_15	106_15.amc	Subject #106 (Female General Subject)
106_16	clean	Subject #106 (Female General Subject)
106_17	clean	Subject #106 (Female General Subject)
106_18	clean	Subject #106 (Female General Subject)
106_19	clean	Subject #106 (Female General Subject)
106_20	clean	Subject #106 (Female General Subject)
106_21	bad AMC	Subject #106 (Female General Subject)
106_22	clean	Subject #106 (Female General Subject)
106_23	clean	Subject #106 (Female General Subject)
106_24	clean	Subject #106 (Female General Subject)
106_25	clean	Subject #106 (Female General Subject)
106_26	clean	Subject #106 (Female General Subject)
106_27	clean	Subject #106 (Female General Subject)
106_28	clean	Subject #106 (Female General Subject)
106_29	clean	Subject #106 (Female General Subject)
106_30	clean	Subject #106 (Female General Subject)
106_31	clean	Subject #106 (Female General Subject)
106_32	clean	Subject #106 (Female General Subject)
106_33	clean	Subject #106 (Female General Subject)
106_34	clean	Subject #106 (Female General Subject)
107_01	Unknown	Subject #107 (Walking with obstacles 1)
107_02	Unknown	Subject #107 (Walking with obstacles 1)
107_03	Unknown	Subject #107 (Walking with obstacles 1)
107_04	Unknown	Subject #107 (Walking with obstacles 1)
107_05	Unknown	Subject #107 (Walking with obstacles 1)
107_06	Unknown	Subject #107 (Walking with obstacles 1)
107_07	Unknown	Subject #107 (Walking with obstacles 1)
107_08	Unknown	Subject #107 (Walking with obstacles 1)
107_09	Unknown	Subject #107 (Walking with obstacles 1)
107_10	Unknown	Subject #107 (Walking with obstacles 1)
107_11	Unknown	Subject #107 (Walking with obstacles 1)
107_12	Unknown	Subject #107 (Walking with obstacles 1)
107_13	Unknown	Subject #107 (Walking with obstacles 1)
107_14	Unknown	Subject #107 (Walking with obstacles 1)
108_01	Unknown	Subject #108 (Walking with obstacles 2)
108_02	Unknown	Subject #108 (Walking with obstacles 2)
108_03	Unknown	Subject #108 (Walking with obstacles 2)
108_04	Unknown	Subject #108 (Walking with obstacles 2)
108_05	Unknown	Subject #108 (Walking with obstacles 2)
108_06	Unknown	Subject #108 (Walking with obstacles 2)
108_07	Unknown	Subject #108 (Walking with obstacles 2)
108_08	Unknown	Subject #108 (Walking with obstacles 2)
108_09	Unknown	Subject #108 (Walking with obstacles 2)
108_10	Unknown	Subject #108 (Walking with obstacles 2)
108_11	Unknown	Subject #108 (Walking with obstacles 2)
108_12	Unknown	Subject #108 (Walking with obstacles 2)
108_13	Unknown	Subject #108 (Walking with obstacles 2)
108_14	Unknown	Subject #108 (Walking with obstacles 2)
108_15	Unknown	Subject #108 (Walking with obstacles 2)
108_16	Unknown	Subject #108 (Walking with obstacles 2)
108_17	Unknown	Subject #108 (Walking with obstacles 2)
108_18	Unknown	Subject #108 (Walking with obstacles 2)
108_19	Unknown	Subject #108 (Walking with obstacles 2)
108_20	Unknown	Subject #108 (Walking with obstacles 2)
108_21	Unknown	Subject #108 (Walking with obstacles 2)
108_22	Unknown	Subject #108 (Walking with obstacles 2)
108_23	Unknown	Subject #108 (Walking with obstacles 2)
108_24	Unknown	Subject #108 (Walking with obstacles 2)
108_25	Unknown	Subject #108 (Walking with obstacles 2)
108_26	Unknown	Subject #108 (Walking with obstacles 2)
108_27	Unknown	Subject #108 (Walking with obstacles 2)
108_28	Unknown	Subject #108 (Walking with obstacles 2)
111_01	Walk backwards	Subject #111 (Pregnant Woman)
111_02	Bow	Subject #111 (Pregnant Woman)
111_03	Crawling	Subject #111 (Pregnant Woman)
111_04	Curtsey	Subject #111 (Pregnant Woman)
111_05	Dance	Subject #111 (Pregnant Woman)
111_06	Get up from floor	Subject #111 (Pregnant Woman)
111_07	Get up from floor	Subject #111 (Pregnant Woman)
111_08	Get up from floor	Subject #111 (Pregnant Woman)
111_09	Get up from chair	Subject #111 (Pregnant Woman)
111_10	get up from chair	Subject #111 (Pregnant Woman)
111_11	get up from chair	Subject #111 (Pregnant Woman)
111_12	Lay down	Subject #111 (Pregnant Woman)
111_13	March	Subject #111 (Pregnant Woman)
111_14	Mope	Subject #111 (Pregnant Woman)
111_15	Motorcycle	Subject #111 (Pregnant Woman)
111_16	Peekaboo	Subject #111 (Pregnant Woman)
111_17	Pick up	Subject #111 (Pregnant Woman)
111_18	Pick up	Subject #111 (Pregnant Woman)
111_19	Punch Kick	Subject #111 (Pregnant Woman)
111_20	Ring around the rosie	Subject #111 (Pregnant Woman)
111_21	Roll over	Subject #111 (Pregnant Woman)
111_22	Range of motion	Subject #111 (Pregnant Woman)
111_23	Run	Subject #111 (Pregnant Woman)
111_24	Run	Subject #111 (Pregnant Woman)
111_25	Shrug	Subject #111 (Pregnant Woman)
111_26	Walk sideways	Subject #111 (Pregnant Woman)
111_27	Walking up stairs	Subject #111 (Pregnant Woman)
111_28	Standing still	Subject #111 (Pregnant Woman)
111_29	Stepping over	Subject #111 (Pregnant Woman)
111_30	Stepping over	Subject #111 (Pregnant Woman)
111_31	Stepping up / stepping down	Subject #111 (Pregnant Woman)
111_32	Stretch and yawn	Subject #111 (Pregnant Woman)
111_33	Throwing	Subject #111 (Pregnant Woman)
111_34	Walk	Subject #111 (Pregnant Woman)
111_35	Walk	Subject #111 (Pregnant Woman)
111_36	Walk and carry	Subject #111 (Pregnant Woman)
111_37	Wave	Subject #111 (Pregnant Woman)
111_38	Yoga	Subject #111 (Pregnant Woman)
111_39	Yoga	Subject #111 (Pregnant Woman)
111_40	Yoga	Subject #111 (Pregnant Woman)
111_41	Yoga	Subject #111 (Pregnant Woman)
113_01	Walk backwards	Subject #113 (Post pregnant woman)
113_02	Bow	Subject #113 (Post pregnant woman)
113_03	Curtsey	Subject #113 (Post pregnant woman)
113_04	Dance	Subject #113 (Post pregnant woman)
113_05	Walk digital 8	Subject #113 (Post pregnant woman)
113_06	Walk figure 8	Subject #113 (Post pregnant woman)
113_07	Run	Subject #113 (Post pregnant woman)
113_08	Lay down and get up	Subject #113 (Post pregnant woman)
113_09	March	Subject #113 (Post pregnant woman)
113_10	Walk, mope around	Subject #113 (Post pregnant woman)
113_11	Motorcycle	Subject #113 (Post pregnant woman)
113_12	Peekaboo	Subject #113 (Post pregnant woman)
113_13	Punch and kick	Subject #113 (Post pregnant woman)
113_14	Ring around the rosie	Subject #113 (Post pregnant woman)
113_15	Sit in chair and get up	Subject #113 (Post pregnant woman)
113_16	Shrug	Subject #113 (Post pregnant woman)
113_17	Walk sideway	Subject #113 (Post pregnant woman)
113_18	Walk sideways	Subject #113 (Post pregnant woman)
113_19	Walking up and down stairs	Subject #113 (Post pregnant woman)
113_20	Walk up and down stairs	Subject #113 (Post pregnant woman)
113_21	Standing Still	Subject #113 (Post pregnant woman)
113_22	Step over	Subject #113 (Post pregnant woman)
113_23	Stretch and yawn	Subject #113 (Post pregnant woman)
113_24	Throw	Subject #113 (Post pregnant woman)
113_25	Walk	Subject #113 (Post pregnant woman)
113_26	Walk and carry	Subject #113 (Post pregnant woman)
113_27	Wave	Subject #113 (Post pregnant woman)
113_28	Yoga	Subject #113 (Post pregnant woman)
113_29	Yoga	Subject #113 (Post pregnant woman)
114_01	Motorcycle	Subject #114 (Pregnant Woman)
114_02	Getting up from laying down	Subject #114 (Pregnant Woman)
114_03	Range of motion	Subject #114 (Pregnant Woman)
114_04	Getting up from chair	Subject #114 (Pregnant Woman)
114_05	Sitting in chair	Subject #114 (Pregnant Woman)
114_06	Getting up from chair	Subject #114 (Pregnant Woman)
114_07	Walking up and down stairs	Subject #114 (Pregnant Woman)
114_08	Walking up and down stairs	Subject #114 (Pregnant Woman)
114_09	Walking up and down stairs	Subject #114 (Pregnant Woman)
114_10	Stretching	Subject #114 (Pregnant Woman)
114_11	Laying down and getting up	Subject #114 (Pregnant Woman)
114_12	Stretching	Subject #114 (Pregnant Woman)
114_13	Walk	Subject #114 (Pregnant Woman)
114_14	Walk	Subject #114 (Pregnant Woman)
114_15	Walk	Subject #114 (Pregnant Woman)
114_16	Sit down and stretch	Subject #114 (Pregnant Woman)
115_01	Pick up box, bend from waist	Subject #115 (Bending over)
115_02	Pick box up, bend from waist	Subject #115 (Bending over)
115_03	Pick box up, bend from waist	Subject #115 (Bending over)
115_04	Pick box up, bend from waist	Subject #115 (Bending over)
115_05	Pick box up, bend from waist	Subject #115 (Bending over)
115_06	Picking box up, bending knees	Subject #115 (Bending over)
115_07	Picking box up, bending knees	Subject #115 (Bending over)
115_08	Picking box up, bending knees	Subject #115 (Bending over)
115_09	Picking box up, bending knees	Subject #115 (Bending over)
115_10	Pick box up, bend from waist	Subject #115 (Bending over)
118_01	Jump	Subject #118 (Jumping)
118_02	Jump	Subject #118 (Jumping)
118_03	Jump	Subject #118 (Jumping)
118_04	Jump	Subject #118 (Jumping)
118_05	Jump	Subject #118 (Jumping)
118_06	Jump	Subject #118 (Jumping)
118_07	Jump	Subject #118 (Jumping)
118_08	Jump	Subject #118 (Jumping)
118_09	Jump	Subject #118 (Jumping)
118_10	Jump	Subject #118 (Jumping)
118_11	Jump	Subject #118 (Jumping)
118_12	Jump	Subject #118 (Jumping)
118_13	Jump	Subject #118 (Jumping)
118_14	Jump	Subject #118 (Jumping)
118_15	Jump	Subject #118 (Jumping)
118_16	Jump	Subject #118 (Jumping)
118_17	Jump	Subject #118 (Jumping)
118_18	Jump	Subject #118 (Jumping)
118_19	Jump	Subject #118 (Jumping)
118_20	Jump	Subject #118 (Jumping)
118_21	Jump	Subject #118 (Jumping)
118_22	Jump	Subject #118 (Jumping)
118_23	Jump	Subject #118 (Jumping)
118_24	Jump	Subject #118 (Jumping)
118_25	Jump	Subject #118 (Jumping)
118_26	Jump	Subject #118 (Jumping)
118_27	Jump	Subject #118 (Jumping)
118_28	Jump	Subject #118 (Jumping)
118_29	Jump	Subject #118 (Jumping)
118_30	Jump	Subject #118 (Jumping)
118_31	Motorcycle	Subject #118 (Jumping)
118_32	Range of motion	Subject #118 (Jumping)
120_01	Alien Turn	Subject #120 (Various Style Walks)
120_02	Gorilla	Subject #120 (Various Style Walks)
120_03	Mickey cast spell	Subject #120 (Various Style Walks)
120_04	Mickey Conducting	Subject #120 (Various Style Walks)
120_05	Mickey Dance	Subject #120 (Various Style Walks)
120_06	Mickey Dance	Subject #120 (Various Style Walks)
120_07	Mickey Dance	Subject #120 (Various Style Walks)
120_08	Mickey sneaky walk	Subject #120 (Various Style Walks)
120_09	Mickey sneaking walk	Subject #120 (Various Style Walks)
120_10	Mickey sneaking walk	Subject #120 (Various Style Walks)
120_11	Mickey sneaking walk	Subject #120 (Various Style Walks)
120_12	Mickey sneaking walk	Subject #120 (Various Style Walks)
120_13	Mickey sneaking walk	Subject #120 (Various Style Walks)
120_14	Mickey sneaking walk	Subject #120 (Various Style Walks)
120_15	Mickey Surprised	Subject #120 (Various Style Walks)
120_16	Mickey Surprised	Subject #120 (Various Style Walks)
120_17	Mickey Walk	Subject #120 (Various Style Walks)
120_18	Mickey Walk	Subject #120 (Various Style Walks)
120_19	Walk slow	Subject #120 (Various Style Walks)
120_20	Walk	Subject #120 (Various Style Walks)
120_21	Robot	Subject #120 (Various Style Walks)
120_22	Zombie	Subject #120 (Various Style Walks)
122_01	clean	Subject #122 (Varying Height and Length Steps)
122_02	clean	Subject #122 (Varying Height and Length Steps)
122_03	clean	Subject #122 (Varying Height and Length Steps)
122_04	clean	Subject #122 (Varying Height and Length Steps)
122_05	clean	Subject #122 (Varying Height and Length Steps)
122_06	clean	Subject #122 (Varying Height and Length Steps)
122_07	clean	Subject #122 (Varying Height and Length Steps)
122_08	clean	Subject #122 (Varying Height and Length Steps)
122_09	clean	Subject #122 (Varying Height and Length Steps)
122_10	clean	Subject #122 (Varying Height and Length Steps)
122_11	Unknown	Subject #122 (Varying Height and Length Steps)
122_12	clean	Subject #122 (Varying Height and Length Steps)
122_13	clean	Subject #122 (Varying Height and Length Steps)
122_14	clean	Subject #122 (Varying Height and Length Steps)
122_15	clean	Subject #122 (Varying Height and Length Steps)
122_16	clean	Subject #122 (Varying Height and Length Steps)
122_17	clean	Subject #122 (Varying Height and Length Steps)
122_18	clean	Subject #122 (Varying Height and Length Steps)
122_19	clean	Subject #122 (Varying Height and Length Steps)
122_20	clean	Subject #122 (Varying Height and Length Steps)
122_21	clean	Subject #122 (Varying Height and Length Steps)
122_22	clean	Subject #122 (Varying Height and Length Steps)
122_23	clean	Subject #122 (Varying Height and Length Steps)
122_24	clean	Subject #122 (Varying Height and Length Steps)
122_25	clean	Subject #122 (Varying Height and Length Steps)
122_26	clean	Subject #122 (Varying Height and Length Steps)
122_27	clean	Subject #122 (Varying Height and Length Steps)
122_28	clean	Subject #122 (Varying Height and Length Steps)
122_29	clean	Subject #122 (Varying Height and Length Steps)
122_30	clean	Subject #122 (Varying Height and Length Steps)
122_31	clean	Subject #122 (Varying Height and Length Steps)
122_32	clean	Subject #122 (Varying Height and Length Steps)
122_33	clean	Subject #122 (Varying Height and Length Steps)
122_34	clean	Subject #122 (Varying Height and Length Steps)
122_35	clean	Subject #122 (Varying Height and Length Steps)
122_36	clean	Subject #122 (Varying Height and Length Steps)
122_37	clean	Subject #122 (Varying Height and Length Steps)
122_38	clean	Subject #122 (Varying Height and Length Steps)
122_39	clean	Subject #122 (Varying Height and Length Steps)
122_40	clean	Subject #122 (Varying Height and Length Steps)
122_41	clean	Subject #122 (Varying Height and Length Steps)
122_42	clean	Subject #122 (Varying Height and Length Steps)
122_43	clean	Subject #122 (Varying Height and Length Steps)
122_44	clean	Subject #122 (Varying Height and Length Steps)
122_45	clean	Subject #122 (Varying Height and Length Steps)
122_46	clean	Subject #122 (Varying Height and Length Steps)
122_47	clean	Subject #122 (Varying Height and Length Steps)
122_48	clean	Subject #122 (Varying Height and Length Steps)
122_49	clean	Subject #122 (Varying Height and Length Steps)
122_50	clean	Subject #122 (Varying Height and Length Steps)
122_51	clean	Subject #122 (Varying Height and Length Steps)
122_52	clean	Subject #122 (Varying Height and Length Steps)
122_53	clean	Subject #122 (Varying Height and Length Steps)
122_54	clean	Subject #122 (Varying Height and Length Steps)
122_55	clean	Subject #122 (Varying Height and Length Steps)
122_56	clean	Subject #122 (Varying Height and Length Steps)
122_57	clean	Subject #122 (Varying Height and Length Steps)
122_58	cleaned	Subject #122 (Varying Height and Length Steps)
122_59	clean	Subject #122 (Varying Height and Length Steps)
122_60	clean	Subject #122 (Varying Height and Length Steps)
122_61	clean	Subject #122 (Varying Height and Length Steps)
122_62	clean	Subject #122 (Varying Height and Length Steps)
122_63	clean	Subject #122 (Varying Height and Length Steps)
122_64	clean	Subject #122 (Varying Height and Length Steps)
122_65	clean	Subject #122 (Varying Height and Length Steps)
122_66	clean	Subject #122 (Varying Height and Length Steps)
122_67	clean	Subject #122 (Varying Height and Length Steps)
122_68	clean	Subject #122 (Varying Height and Length Steps)
123_01	15.5 lbs	Subject #123 (Carry Suitcase with Varying Weights)
123_02	15.5 lbs	Subject #123 (Carry Suitcase with Varying Weights)
123_03	19.5lb	Subject #123 (Carry Suitcase with Varying Weights)
123_04	19.5 lbs	Subject #123 (Carry Suitcase with Varying Weights)
123_05	19.5 lbs	Subject #123 (Carry Suitcase with Varying Weights)
123_06	19.5 lbs	Subject #123 (Carry Suitcase with Varying Weights)
123_07	12.5lb	Subject #123 (Carry Suitcase with Varying Weights)
123_08	12.5 lbs	Subject #123 (Carry Suitcase with Varying Weights)
123_09	12.5 lbs	Subject #123 (Carry Suitcase with Varying Weights)
123_10	12.5lb	Subject #123 (Carry Suitcase with Varying Weights)
123_11	15.5 lbs	Subject #123 (Carry Suitcase with Varying Weights)
123_12	15.5 lbs	Subject #123 (Carry Suitcase with Varying Weights)
123_13	15.5 lbs	Subject #123 (Carry Suitcase with Varying Weights)
124_01	Baseball Pitch	Subject #124 (Sports Related Motions)
124_02	Baseball Pitch	Subject #124 (Sports Related Motions)
124_03	Basketball Shoot	Subject #124 (Sports Related Motions)
124_04	Basketball Free Throw	Subject #124 (Sports Related Motions)
124_05	Basketball Jump Shot	Subject #124 (Sports Related Motions)
124_06	Basketball Lay Up	Subject #124 (Sports Related Motions)
124_07	Baseball Swing	Subject #124 (Sports Related Motions)
124_08	Baseball Bunt	Subject #124 (Sports Related Motions)
124_09	Frisbee	Subject #124 (Sports Related Motions)
124_10	Motorcycle	Subject #124 (Sports Related Motions)
124_11	2 Foot Jump	Subject #124 (Sports Related Motions)
124_12	Underhand Toss	Subject #124 (Sports Related Motions)
124_13	Underhand Fast Pitch	Subject #124 (Sports Related Motions)
125_01	Breast Stroke	Subject #125 (Swimming)
125_02	Breast Stroke	Subject #125 (Swimming)
125_03	Break Stroke	Subject #125 (Swimming)
125_04	Breast Stroke	Subject #125 (Swimming)
125_05	Butterfly	Subject #125 (Swimming)
125_06	Free Style	Subject #125 (Swimming)
125_07	Motorcycle	Subject #125 (Swimming)
126_01	Back Stroke	Subject #126 (Swimming 2)
126_02	Back Stroke	Subject #126 (Swimming 2)
126_03	Breast Stroke	Subject #126 (Swimming 2)
126_04	Breast Stroke	Subject #126 (Swimming 2)
126_05	Breast Stroke	Subject #126 (Swimming 2)
126_06	Fly Stroke	Subject #126 (Swimming 2)
126_07	Fly Stroke	Subject #126 (Swimming 2)
126_08	Fly Stroke	Subject #126 (Swimming 2)
126_09	Fly Stroke	Subject #126 (Swimming 2)
126_10	Free Style	Subject #126 (Swimming 2)
126_11	Free Style	Subject #126 (Swimming 2)
126_12	Free Style	Subject #126 (Swimming 2)
126_13	Motorcycle	Subject #126 (Swimming 2)
126_14	Range of Motion	Subject #126 (Swimming 2)
127_01	Motorcycle	Subject #127 (Action Adventure Obstacles, running, jumping, ducking, rolling)
127_02	Range of Motion	Subject #127 (Action Adventure Obstacles, running, jumping, ducking, rolling)
127_03	Run	Subject #127 (Action Adventure Obstacles, running, jumping, ducking, rolling)
127_04	Walk to Run	Subject #127 (Action Adventure Obstacles, running, jumping, ducking, rolling)
127_05	Run to Quick Stop	Subject #127 (Action Adventure Obstacles, running, jumping, ducking, rolling)
127_06	Run	Subject #127 (Action Adventure Obstacles, running, jumping, ducking, rolling)
127_07	Run	Subject #127 (Action Adventure Obstacles, running, jumping, ducking, rolling)
127_08	Run	Subject #127 (Action Adventure Obstacles, running, jumping, ducking, rolling)
127_09	Run Right	Subject #127 (Action Adventure Obstacles, running, jumping, ducking, rolling)
127_10	Run Right	Subject #127 (Action Adventure Obstacles, running, jumping, ducking, rolling)
127_11	Run Left	Subject #127 (Action Adventure Obstacles, running, jumping, ducking, rolling)
127_12	Run Left	Subject #127 (Action Adventure Obstacles, running, jumping, ducking, rolling)
127_13	Run Side Step Left	Subject #127 (Action Adventure Obstacles, running, jumping, ducking, rolling)
127_14	Run Side Step Right	Subject #127 (Action Adventure Obstacles, running, jumping, ducking, rolling)
127_15	Run Turn Left	Subject #127 (Action Adventure Obstacles, running, jumping, ducking, rolling)
127_16	Run Turn Right	Subject #127 (Action Adventure Obstacles, running, jumping, ducking, rolling)
127_17	Run Stop Run	Subject #127 (Action Adventure Obstacles, running, jumping, ducking, rolling)
127_18	Run Stop Run	Subject #127 (Action Adventure Obstacles, running, jumping, ducking, rolling)
127_19	Run Quick Stop Run	Subject #127 (Action Adventure Obstacles, running, jumping, ducking, rolling)
127_20	Run Quick Stop Run	Subject #127 (Action Adventure Obstacles, running, jumping, ducking, rolling)
127_21	Run Jump Stop Run	Subject #127 (Action Adventure Obstacles, running, jumping, ducking, rolling)
127_22	Run Jump Stop Run	Subject #127 (Action Adventure Obstacles, running, jumping, ducking, rolling)
127_23	Run Dive Over Roll Run	Subject #127 (Action Adventure Obstacles, running, jumping, ducking, rolling)
127_24	Run Dive Over Roll Run	Subject #127 (Action Adventure Obstacles, running, jumping, ducking, rolling)
127_25	Run Jump Over	Subject #127 (Action Adventure Obstacles, running, jumping, ducking, rolling)
127_26	Run Jump Over	Subject #127 (Action Adventure Obstacles, running, jumping, ducking, rolling)
127_27	Run Jump Over	Subject #127 (Action Adventure Obstacles, running, jumping, ducking, rolling)
127_28	Run Jump Over	Subject #127 (Action Adventure Obstacles, running, jumping, ducking, rolling)
127_29	Run Duck Underneath	Subject #127 (Action Adventure Obstacles, running, jumping, ducking, rolling)
127_30	Run Duck Underneath	Subject #127 (Action Adventure Obstacles, running, jumping, ducking, rolling)
127_31	Run Duck Underneath	Subject #127 (Action Adventure Obstacles, running, jumping, ducking, rolling)
127_32	Run Duck Underneath	Subject #127 (Action Adventure Obstacles, running, jumping, ducking, rolling)
127_33	Run Over	Subject #127 (Action Adventure Obstacles, running, jumping, ducking, rolling)
127_34	Run Over	Subject #127 (Action Adventure Obstacles, running, jumping, ducking, rolling)
127_35	Run Over	Subject #127 (Action Adventure Obstacles, running, jumping, ducking, rolling)
127_36	Run Over	Subject #127 (Action Adventure Obstacles, running, jumping, ducking, rolling)
127_37	Run Duck Underneath	Subject #127 (Action Adventure Obstacles, running, jumping, ducking, rolling)
127_38	Run Duck Underneath	Subject #127 (Action Adventure Obstacles, running, jumping, ducking, rolling)
128_01	Motorcycle	Subject #128 (Action Adventure Motions running, ducking, rolling, stopping)
128_02	Run Left	Subject #128 (Action Adventure Motions running, ducking, rolling, stopping)
128_03	Run Right	Subject #128 (Action Adventure Motions running, ducking, rolling, stopping)
[truncated: 435 more rows]
